# Supplementary material
Source: publisher figshare collection journal article supplement (https://gsajournals.figshare.com/ndownloader/files/26708588)
Supplement: Supplementary file 1 [file 26708588]

## Sheet: Sheet1
LG	cM	Trinity_Component	exon	snp_pos_in_exon	Associated_Gene_Name	Ensembl_Gene_ID
1	2.27549	comp15323_c0	exon5	125	Nudt14	ENSMUSG00000002804
1	2.27549	comp15193_c0	exon13	165	Gm266	ENSMUSG00000010529
1	2.27549	comp86529_c0	exon14	110	Adssl1	ENSMUSG00000011148
1	2.27549	comp86529_c0	exon14	141	Adssl1	ENSMUSG00000011148
1	2.27549	comp80144_c0	exon22	140	Esyt2	ENSMUSG00000021171
1	2.27549	comp57003_c0	exon1	98	Xrcc3	ENSMUSG00000021287
1	2.27549	comp83718_c0	exon2	818	Zbtb42	ENSMUSG00000037638
1	2.27549	comp73521_c0	exon1	1399	Cdca4	ENSMUSG00000047832
1	2.27549	comp73521_c0	exon1	1430	Cdca4	ENSMUSG00000047832
1	2.27549	comp73521_c0	exon1	1447	Cdca4	ENSMUSG00000047832
1	2.27549	comp73780_c0	exon1	93	Ahnak2	ENSMUSG00000072812
1	3.35035	comp83534_c0	exon3	1680	Tdrd9	ENSMUSG00000054003
1	3.35035	comp83534_c0	exon3	1665	Tdrd9	ENSMUSG00000054003
1	4.4306	comp81830_c0	exon21	55	Akt1	ENSMUSG00000001729
1	4.4306	comp46563_c0	exon72	547	Dync1h1	ENSMUSG00000018707
1	4.4306	comp46563_c0	exon72	571	Dync1h1	ENSMUSG00000018707
1	4.4306	comp86628_c0	exon16	568	Slc25a29	ENSMUSG00000021265
1	4.4306	comp86628_c0	exon16	544	Slc25a29	ENSMUSG00000021265
1	4.4306	comp59360_c0	exon3	191	Cinp	ENSMUSG00000021276
1	4.4306	comp75442_c0	exon14	600	Traf3	ENSMUSG00000021277
1	4.4306	comp85320_c0	exon1	2262	Cdc42bpb	ENSMUSG00000021279
1	4.4306	comp73844_c2	exon2	720	Rcor1	ENSMUSG00000037896
1	4.4306	comp73844_c2	exon2	755	Rcor1	ENSMUSG00000037896
1	4.4306	comp67747_c0	exon7	732	Wdr20	ENSMUSG00000037957
1	4.4306	comp21649_c0	exon6	2931	Cep170b	ENSMUSG00000072825
1	4.4306	comp21649_c0	exon6	2937	Cep170b	ENSMUSG00000072825
1	7.20667	comp68096_c0	exon1	788	Ccnk	ENSMUSG00000021258
1	7.20667	comp85720_c0	exon3	1051	Setd3	ENSMUSG00000056770
1	7.20667	comp76889_c1	exon5	1705	Ccdc85c	ENSMUSG00000084883
1	9.99786	comp70766_c1	exon19	2224	Atg2b	ENSMUSG00000041341
1	9.99786	comp86207_c0	exon22	66	Gskip	ENSMUSG00000044715
1	11.6108	comp74445_c0	exon1	1163	Golga5	ENSMUSG00000021192
1	11.6108	comp45342_c0	exon9	364	Ddx24	ENSMUSG00000041645
1	14.3707	comp75321_c0	exon9	114	Atxn3	ENSMUSG00000021189
1	14.3707	comp68045_c2	exon2	2616	Ubr7	ENSMUSG00000041712
1	14.3707	comp77927_c0	exon2	1680	Cpsf2	ENSMUSG00000041781
1	14.3707	comp74313_c0	exon2	577	Serpina1b	ENSMUSG00000071178
1	16.5334	comp80769_c2	exon9	93	Tdp1	ENSMUSG00000021177
1	16.5334	comp70686_c0	exon13	49	Fbln5	ENSMUSG00000021186
1	16.5334	comp76948_c0	exon11	226	Btbd7	ENSMUSG00000041702
1	17.6096	comp49502_c0	exon5	2079	Ptpn21	ENSMUSG00000021009
1	17.6096	comp73893_c1	exon2	1229	Ttc8	ENSMUSG00000021013
1	18.1537	comp82135_c1	exon10	856	Ston2	ENSMUSG00000020961
1	18.1537	comp65541_c0	exon1	2711	Gtf2a1	ENSMUSG00000020962
1	18.1537	comp15194_c0	exon9	987	Vipas39	ENSMUSG00000021038
1	18.1537	comp15194_c0	exon9	1045	Vipas39	ENSMUSG00000021038
1	18.1537	comp85393_c0	exon7	181	Slirp	ENSMUSG00000021040
1	18.1537	comp81153_c1	exon35	100	Tmed8	ENSMUSG00000034111
1	18.1537	comp72059_c0	exon28	192	Cipc	ENSMUSG00000034157
1	18.6913	comp78665_c0	exon25	90	Dlst	ENSMUSG00000004789
1	18.6913	comp15194_c0	exon9	1051	Vipas39	ENSMUSG00000021038
1	19.2291	comp85235_c0	exon20	70	0610007P14Rik	ENSMUSG00000021252
1	19.2291	comp86709_c0	exon7	213	Ift43	ENSMUSG00000007867
1	19.2291	comp84125_c0	exon1	904	Ttll5	ENSMUSG00000012609
1	19.2291	comp39380_c0	exon11	99	Jdp2	ENSMUSG00000034271
1	19.2291	comp39380_c0	exon11	97	Jdp2	ENSMUSG00000034271
1	21.9805	comp80836_c0	exon37	253	Ltbp2	ENSMUSG00000002020
1	21.9805	comp86058_c0	exon16	118	Eif2b2	ENSMUSG00000004788
1	21.9805	comp86058_c0	exon16	83	Eif2b2	ENSMUSG00000004788
1	21.9805	comp78665_c0	exon25	112	Dlst	ENSMUSG00000004789
1	21.9805	comp56230_c0	exon12	263	Pgf	ENSMUSG00000004791
1	21.9805	comp47128_c0	exon4	142	Acyp1	ENSMUSG00000008822
1	21.9805	comp44255_c0	exon5	118	Dcaf4	ENSMUSG00000021222
1	21.9805	comp44255_c0	exon5	105	Dcaf4	ENSMUSG00000021222
1	21.9805	comp63806_c0	exon12	219	Fam161b	ENSMUSG00000021234
1	21.9805	comp63806_c0	exon12	207	Fam161b	ENSMUSG00000021234
1	21.9805	comp63806_c0	exon12	210	Fam161b	ENSMUSG00000021234
1	21.9805	comp54609_c0	exon7	77	Aldh6a1	ENSMUSG00000021238
1	21.9805	comp43652_c0	exon24	146	Abcd4	ENSMUSG00000021240
1	21.9805	comp72040_c0	exon18	551	Ylpm1	ENSMUSG00000021244
1	21.9805	comp56647_c0	exon1	1076	Tmed10	ENSMUSG00000021248
1	21.9805	comp56647_c0	exon1	1099	Tmed10	ENSMUSG00000021248
1	21.9805	comp63327_c1	exon29	210	Elmsan1	ENSMUSG00000042507
1	21.9805	comp81310_c0	exon6	356	Zfyve1	ENSMUSG00000042628
1	21.9805	comp32541_c0	exon1	1085	Lin52	ENSMUSG00000085793
1	21.9805	comp32541_c0	exon1	1093	Lin52	ENSMUSG00000085793
1	24.1643	comp85454_c0	exon8	172	Med6	ENSMUSG00000002679
1	24.1643	comp79149_c2	exon1	323	Erh	ENSMUSG00000021131
1	24.1643	comp79149_c2	exon1	338	Erh	ENSMUSG00000021131
1	24.1643	comp79002_c0	exon15	175	Ttc9	ENSMUSG00000042734
1	24.1643	comp82018_c0	exon2	441	Tmem229b	ENSMUSG00000046157
1	24.1643	comp82018_c0	exon2	462	Tmem229b	ENSMUSG00000046157
1	24.1643	comp69979_c0	exon1	1398	Gphn	ENSMUSG00000047454
1	24.1643	comp71295_c0	exon1	3226	Plekhh1	ENSMUSG00000060716
1	24.1643	comp16266_c0	exon7	128	Rdh11	ENSMUSG00000066441
1	24.1643	comp72786_c1	exon11	113	Cox16	ENSMUSG00000091803
1	24.1643	comp76842_c1	exon11	121	Gm26669	ENSMUSG00000097417
1	26.4108	comp80873_c0	exon5	81	Fut8	ENSMUSG00000021065
1	26.4108	comp80873_c0	exon5	114	Fut8	ENSMUSG00000021065
1	26.4108	comp68679_c0	exon1	1093	Snapc1	ENSMUSG00000021113
1	29.2279	comp82213_c0	exon2	346	Sgpp1	ENSMUSG00000021054
1	29.2279	comp82213_c0	exon2	325	Sgpp1	ENSMUSG00000021054
1	34.4165	comp82434_c0	exon15	93	Pole2	ENSMUSG00000020974
1	34.4165	comp78078_c0	exon5	2711	Sec23a	ENSMUSG00000020986
1	34.4165	comp75461_c0	exon31	123	Cdkl1	ENSMUSG00000020990
1	34.4165	comp78306_c0	exon3	416	Sav1	ENSMUSG00000021067
1	34.4165	comp78306_c0	exon3	413	Sav1	ENSMUSG00000021067
1	34.4165	comp79947_c0	exon6	154	Tmx1	ENSMUSG00000021072
1	34.4165	comp50971_c0	exon4	320	Trmt5	ENSMUSG00000034442
1	34.4165	comp73751_c0	exon3	367	Daam1	ENSMUSG00000034574
1	34.4165	comp81054_c2	exon1	1380	2700049A03Rik	ENSMUSG00000034601
1	34.4165	comp75414_c0	exon3	2279	Prpf39	ENSMUSG00000035597
1	34.4165	comp75414_c0	exon3	2260	Prpf39	ENSMUSG00000035597
1	34.4165	comp77378_c0	exon25	206	Fam179b	ENSMUSG00000035614
1	34.4165	comp82728_c0	exon5	457	Mgat2	ENSMUSG00000043998
1	34.4165	comp77171_c0	exon2	914	Slc38a6	ENSMUSG00000044712
1	34.4165	comp78030_c0	exon6	219	Arid4a	ENSMUSG00000048118
1	34.4165	comp68978_c0	exon1	763	Vcpkmt	ENSMUSG00000049882
1	34.4165	comp25446_c0	exon15	82	Atp5s	ENSMUSG00000054894
1	37.6809	comp85521_c0	exon5	614	Sh3gl1	ENSMUSG00000003200
1	37.6809	comp78998_c0	exon1	102	Trappc6b	ENSMUSG00000020993
1	37.6809	comp74623_c0	exon4	172	Nfkbia	ENSMUSG00000021025
1	37.6809	comp84329_c0	exon29	241	Baz1a	ENSMUSG00000035021
1	37.6809	comp84329_c0	exon29	220	Baz1a	ENSMUSG00000035021
1	37.6809	comp48855_c0	exon1	927	Fbxo33	ENSMUSG00000035329
1	37.6809	comp15416_c0	exon4	802	Sptssa	ENSMUSG00000044408
1	37.6809	comp82150_c0	exon2	607	Clec14a	ENSMUSG00000045930
1	37.6809	comp79916_c0	exon11	45	Cfl2	ENSMUSG00000062929
1	40.4372	comp55665_c0	exon2	316	Nubpl	ENSMUSG00000035142
1	44.7814	comp15845_c0	exon1	4315	Scin	ENSMUSG00000002565
1	50.3472	comp15155_c0	exon6	931	Bzw2	ENSMUSG00000020547
1	50.3472	comp85426_c0	exon5	108	Sypl	ENSMUSG00000020570
1	50.3472	comp65169_c1	exon53	194	Snx13	ENSMUSG00000020590
1	50.3472	comp78146_c1	exon3	333	Arl4a	ENSMUSG00000047446
1	53.7497	comp73305_c2	exon11	297	Map4k3	ENSMUSG00000024242
1	53.7497	comp73483_c0	exon7	1490	Ppp1r21	ENSMUSG00000034709
1	54.9284	comp85797_c0	exon14	30	Pcbd1	ENSMUSG00000020098
1	54.9284	comp56565_c0	exon3	2630	Lrpprc	ENSMUSG00000024120
1	54.9284	comp84356_c1	exon1	1008	Eml4	ENSMUSG00000032624
1	54.9284	comp41895_c0	exon13	311	Pnpla8	ENSMUSG00000036257
1	54.9284	comp67968_c0	exon5	1522	Socs5	ENSMUSG00000037104
1	54.9284	comp81624_c2	exon18	105	Plekhh2	ENSMUSG00000040852
1	54.9284	comp68169_c0	exon2	54	Ppm1b	ENSMUSG00000061130
1	59.9745	comp85843_c0	exon1	1425	Col6a1	ENSMUSG00000001119
1	59.9745	comp76682_c0	exon4	154	Agpat3	ENSMUSG00000001211
1	59.9745	comp64612_c0	exon13	169	Slc19a1	ENSMUSG00000001436
1	59.9745	comp70722_c0	exon4	2006	Bcr	ENSMUSG00000009681
1	59.9745	comp76807_c0	exon6	197	Eif4ebp2	ENSMUSG00000020091
1	59.9745	comp76807_c0	exon6	160	Eif4ebp2	ENSMUSG00000020091
1	59.9745	comp76807_c0	exon6	196	Eif4ebp2	ENSMUSG00000020091
1	59.9745	comp81500_c0	exon1	1825	Cabin1	ENSMUSG00000020196
1	59.9745	comp73278_c0	exon1	1934	Il1r1	ENSMUSG00000026072
1	59.9745	comp73935_c0	exon1	2039	Pwp2	ENSMUSG00000032834
1	59.9745	comp86472_c0	exon4	1596	Lss	ENSMUSG00000033105
1	59.9745	comp80801_c1	exon2	689	Upb1	ENSMUSG00000033427
1	59.9745	comp83037_c2	exon8	2836	Jmjd1c	ENSMUSG00000037876
1	59.9745	comp83037_c2	exon8	2839	Jmjd1c	ENSMUSG00000037876
1	59.9745	comp45871_c0	exon17	660	Zfp280b	ENSMUSG00000049764
1	59.9745	comp70254_c0	exon3	1312	Ado	ENSMUSG00000057134
1	59.9745	comp81640_c1	exon31	453	Ipmk	ENSMUSG00000060733
1	59.9745	comp80838_c0	exon4	95	Rrp1	ENSMUSG00000061032
1	59.9745	comp56313_c0	exon2	942	Nrbf2	ENSMUSG00000075000
1	59.9745	comp75228_c1	exon2	1180	Mob3a	ENSMUSG00000003348
1	59.9745	comp65667_c0	exon1	1931	Srpk1	ENSMUSG00000004865
1	59.9745	comp84016_c0	exon6	71	Kctd20	ENSMUSG00000005936
1	59.9745	comp84016_c0	exon6	109	Kctd20	ENSMUSG00000005936
1	59.9745	comp84016_c0	exon6	137	Kctd20	ENSMUSG00000005936
1	59.9745	comp79111_c1	exon2	1926	Pknox1	ENSMUSG00000006705
1	59.9745	comp81801_c0	exon2	174	Cdkn1a	ENSMUSG00000023067
1	59.9745	comp81801_c0	exon2	182	Cdkn1a	ENSMUSG00000023067
1	59.9745	comp82202_c0	exon4	250	Ndufv3	ENSMUSG00000024038
1	59.9745	comp82202_c0	exon4	199	Ndufv3	ENSMUSG00000024038
1	59.9745	comp82202_c0	exon4	262	Ndufv3	ENSMUSG00000024038
1	59.9745	comp85569_c0	exon31	112	Nudt3	ENSMUSG00000024213
1	59.9745	comp71670_c0	exon1	104	Fkbp5	ENSMUSG00000024222
1	59.9745	comp82710_c0	exon22	173	Vps52	ENSMUSG00000024319
1	59.9745	comp81995_c0	exon74	185	Uhrf1bp1	ENSMUSG00000039512
1	59.9745	comp73511_c0	exon6	717	Zfand3	ENSMUSG00000044477
1	59.9745	comp76725_c0	exon12	320	Zbtb9	ENSMUSG00000079605
1	59.9745	comp15307_c0	exon6	255	Rnf8	ENSMUSG00000090083
1	59.9745	comp15307_c0	exon6	291	Rnf8	ENSMUSG00000090083
1	59.9745	comp61121_c1	exon17	199	Med16	ENSMUSG00000013833
1	61.055	comp86523_c0	exon17	116	Gtf2h4	ENSMUSG00000001524
1	61.055	comp63513_c0	exon5	105	Alkbh7	ENSMUSG00000002661
1	61.055	comp55891_c0	exon8	153	Hdgfrp2	ENSMUSG00000002833
1	61.055	comp84038_c3	exon18	179	Khsrp	ENSMUSG00000007670
1	61.055	comp79489_c1	exon4	2234	Ptprs	ENSMUSG00000013236
1	61.055	comp78866_c0	exon2	103	Trip10	ENSMUSG00000019487
1	61.055	comp80476_c0	exon1	2171	Srbd1	ENSMUSG00000024135
1	61.055	comp71086_c0	exon10	206	Plin3	ENSMUSG00000024197
1	61.055	comp71086_c0	exon10	241	Plin3	ENSMUSG00000024197
1	61.055	comp71086_c0	exon10	230	Plin3	ENSMUSG00000024197
1	61.055	comp55387_c0	exon1	2146	Kdm4b	ENSMUSG00000024201
1	61.055	comp77059_c0	exon1	1774	Safb2	ENSMUSG00000042625
1	61.055	comp63752_c0	exon6	1291	Fem1a	ENSMUSG00000043683
1	61.055	comp63752_c0	exon6	1294	Fem1a	ENSMUSG00000043683
1	61.055	comp63752_c0	exon6	1318	Fem1a	ENSMUSG00000043683
1	61.055	comp83710_c0	exon2	972	Tnfaip8l1	ENSMUSG00000044469
1	61.055	comp83710_c0	exon2	971	Tnfaip8l1	ENSMUSG00000044469
1	61.055	comp83964_c2	exon1	2488	Slc25a23	ENSMUSG00000046329
1	61.055	comp80926_c0	exon2	1359	Ticam1	ENSMUSG00000047123
1	61.055	comp80926_c0	exon2	1360	Ticam1	ENSMUSG00000047123
1	61.055	comp65736_c0	exon3	182	Rab11b	ENSMUSG00000077450
1	62.1355	comp63513_c0	exon5	91	Alkbh7	ENSMUSG00000002661
1	62.1355	comp82696_c0	exon1	2400	Safb	ENSMUSG00000071054
1	62.1355	comp83360_c0	exon11	69	Ranbp3	ENSMUSG00000002372
1	62.1355	comp86577_c0	exon9	60	Csnk2b	ENSMUSG00000024387
1	62.1355	comp77285_c0	exon43	1027	Midn	ENSMUSG00000035621
1	62.1355	comp65796_c0	exon5	141	Rnf126	ENSMUSG00000035890
1	62.1355	comp68063_c0	exon3	537	Btnl4	ENSMUSG00000058435
1	62.1355	comp82823_c0	exon6	73	Flot1	ENSMUSG00000059714
1	62.1355	comp71293_c0	exon3	603	Btbd9	ENSMUSG00000062202
1	62.1355	comp84341_c1	exon15	226	Ap3d1	ENSMUSG00000020198
1	62.1355	comp69826_c0	exon27	142	Mllt1	ENSMUSG00000024212
1	62.1355	comp80188_c0	exon9	368	Dot1l	ENSMUSG00000061589
1	62.1355	comp29800_c0	exon7	154	Ier3	ENSMUSG00000003541
1	62.1355	comp73760_c0	exon1	371	Cnn2	ENSMUSG00000004665
1	62.1355	comp15078_c0	exon11	81	Pias4	ENSMUSG00000004934
1	62.1355	comp80830_c0	exon3	134	Casp14	ENSMUSG00000005355
1	62.1355	comp80830_c0	exon3	154	Casp14	ENSMUSG00000005355
1	62.1355	comp79884_c0	exon1	260	Neu1	ENSMUSG00000007038
1	62.1355	comp72432_c0	exon5	102	Mum1	ENSMUSG00000020156
1	62.1355	comp84341_c1	exon15	169	Ap3d1	ENSMUSG00000020198
1	62.1355	comp86997_c0	exon5	139	Polrmt	ENSMUSG00000020329
1	62.1355	comp81918_c1	exon11	64	Nelfe	ENSMUSG00000024369
1	62.1355	comp81918_c1	exon11	30	Nelfe	ENSMUSG00000024369
1	62.1355	comp70644_c0	exon2	1490	Bag6	ENSMUSG00000024392
1	62.1355	comp78242_c0	exon2	287	Ppp1r18	ENSMUSG00000034595
1	62.1355	comp39003_c0	exon23	144	Pbx2	ENSMUSG00000034673
1	62.1355	comp86268_c0	exon3	295	Mrpl54	ENSMUSG00000034932
1	62.1355	comp78859_c2	exon3	350	Plekhj1	ENSMUSG00000035278
1	62.1355	comp70084_c0	exon19	103	Misp	ENSMUSG00000035852
1	62.1355	comp74273_c0	exon15	104	Abcf1	ENSMUSG00000038762
1	62.1355	comp85756_c0	exon4	135	Ppap2c	ENSMUSG00000052151
1	62.1355	comp79254_c0	exon2	3242	Mdc1	ENSMUSG00000061607
1	62.1355	comp67997_c0	exon12	84	C4b	ENSMUSG00000073418
1	62.1355	comp78479_c0	exon4	154	Smim24	ENSMUSG00000078439
1	62.1355	comp71908_c0	exon11	566	Dohh	ENSMUSG00000078440
1	62.1355	comp71908_c0	exon11	565	Dohh	ENSMUSG00000078440
1	62.1355	comp15822_c0	exon9	250	Scamp4	ENSMUSG00000078441
1	62.1355	comp15822_c0	exon9	263	Scamp4	ENSMUSG00000078441
1	62.1355	comp75196_c0	exon6	501	2021-03-02	ENSMUSG00000079557
1	62.1355	comp16218_c0	exon1	882	Lmnb2	ENSMUSG00000062075
1	64.8425	comp39835_c0	exon22	352	Vps26a	ENSMUSG00000020078
1	65.3802	comp15942_c0	exon3	22	Ddt	ENSMUSG00000001666
1	65.3802	comp56855_c0	exon4	831	Ranbp2	ENSMUSG00000003226
1	65.3802	comp56855_c0	exon4	846	Ranbp2	ENSMUSG00000003226
1	65.3802	comp71525_c0	exon22	236	Psap	ENSMUSG00000004207
1	65.3802	comp54431_c0	exon6	89	Pla2g12b	ENSMUSG00000009646
1	65.3802	comp48798_c0	exon13	154	AI597479	ENSMUSG00000010290
1	65.3802	comp21706_c0	exon12	107	2021-09-10	ENSMUSG00000019917
1	65.3802	comp63899_c1	exon4	78	Sirt1	ENSMUSG00000020063
1	65.3802	comp63899_c1	exon4	75	Sirt1	ENSMUSG00000020063
1	65.3802	comp70017_c0	exon1	2012	Herc4	ENSMUSG00000020064
1	65.3802	comp74941_c0	exon9	619	Pbld1	ENSMUSG00000020072
1	65.3802	comp71378_c0	exon8	1423	Ddx50	ENSMUSG00000020076
1	65.3802	comp71378_c0	exon8	1386	Ddx50	ENSMUSG00000020076
1	65.3802	comp67266_c0	exon1	731	Hkdc1	ENSMUSG00000020080
1	65.3802	comp67266_c0	exon1	754	Hkdc1	ENSMUSG00000020080
1	65.3802	comp76807_c0	exon6	139	Eif4ebp2	ENSMUSG00000020091
1	65.3802	comp75621_c0	exon35	136	Pald1	ENSMUSG00000020092
1	65.3802	comp85797_c0	exon14	53	Pcbd1	ENSMUSG00000020098
1	65.3802	comp55456_c0	exon9	356	4632428N05Rik	ENSMUSG00000020101
1	65.3802	comp16569_c0	exon1	844	Ddit4	ENSMUSG00000020108
1	65.3802	comp55801_c0	exon4	559	Pdcl3	ENSMUSG00000026078
1	65.3802	comp73786_c1	exon3	1049	Rev1	ENSMUSG00000026082
1	65.3802	comp75288_c0	exon1	1994	Eif5b	ENSMUSG00000026083
1	65.3802	comp75288_c0	exon1	2027	Eif5b	ENSMUSG00000026083
1	65.3802	comp15081_c0	exon6	104	Mgat4a	ENSMUSG00000026110
1	65.3802	comp82567_c0	exon1	1640	Unc50	ENSMUSG00000026111
1	65.3802	comp84145_c0	exon8	181	Gucd1	ENSMUSG00000033416
1	65.3802	comp15742_c0	exon7	1139	Ccdc115	ENSMUSG00000042111
1	65.3802	comp15742_c0	exon7	1140	Ccdc115	ENSMUSG00000042111
1	65.3802	comp82920_c2	exon5	243	Rnf149	ENSMUSG00000048234
1	65.3802	comp16012_c0	exon4	78	Mrps9	ENSMUSG00000060679
1	65.3802	comp72169_c0	exon17	190	Lyg2	ENSMUSG00000061584
1	65.3802	comp75506_c0	exon2	355	Ankrd39	ENSMUSG00000079610
1	65.3802	comp73348_c0	exon14	151	Sowahc	ENSMUSG00000098188
1	65.3802	comp83465_c0	exon8	194	Cnot11	ENSMUSG00000003135
1	65.3802	comp70683_c0	exon12	1913	Kansl3	ENSMUSG00000010453
1	65.3802	comp78098_c1	exon36	92	Ank3	ENSMUSG00000069601
1	65.3802	comp70492_c0	exon4	493	Gstt1	ENSMUSG00000001663
1	65.3802	comp48798_c0	exon13	131	AI597479	ENSMUSG00000010290
1	65.3802	comp76707_c0	exon1	993	Sar1a	ENSMUSG00000020088
1	65.3802	comp16560_c0	exon16	142	Pofut2	ENSMUSG00000020260
1	65.3802	comp74327_c0	exon18	2323	Tmem131	ENSMUSG00000026116
1	65.3802	comp74163_c0	exon3	1937	Ppard	ENSMUSG00000002250
1	65.3802	comp44675_c0	exon7	197	Ddah2	ENSMUSG00000007039
1	65.3802	comp77962_c1	exon16	595	Tysnd1	ENSMUSG00000020087
1	65.3802	comp15488_c0	exon13	81	Aes	ENSMUSG00000054452
1	65.3802	comp15488_c0	exon13	79	Aes	ENSMUSG00000054452
1	65.3802	comp72077_c0	exon2	140	Lman2l	ENSMUSG00000001143
1	65.3802	comp72077_c0	exon2	117	Lman2l	ENSMUSG00000001143
1	65.3802	comp85273_c0	exon19	114	Sgpl1	ENSMUSG00000020097
1	65.3802	comp74160_c0	exon2	1186	Slc29a3	ENSMUSG00000020100
1	65.3802	comp50551_c0	exon4	510	D10Jhu81e	ENSMUSG00000053329
1	65.3802	comp85290_c0	exon19	444	Agpat1	ENSMUSG00000034254
1	66.4527	comp69719_c0	exon1	1266	Pex6	ENSMUSG00000002763
1	66.4527	comp73803_c0	exon3	246	Frs3	ENSMUSG00000023266
1	66.4527	comp73803_c0	exon3	245	Frs3	ENSMUSG00000023266
1	66.4527	comp56200_c0	exon3	1465	Mut	ENSMUSG00000023921
1	66.4527	comp79747_c1	exon6	860	Fam135a	ENSMUSG00000026153
1	66.4527	comp79747_c1	exon6	872	Fam135a	ENSMUSG00000026153
1	67.5367	comp56845_c0	exon2	379	Mrps18a	ENSMUSG00000023967
1	67.5367	comp78624_c0	exon5	359	Taf8	ENSMUSG00000023980
1	67.5367	comp56180_c0	exon50	199	Srf	ENSMUSG00000015605
1	67.5367	comp42193_c0	exon1	584	Pla2g7	ENSMUSG00000023913
1	67.5367	comp82038_c1	exon19	185	Gpr115	ENSMUSG00000023918
1	67.5367	comp85706_c0	exon3	201	Mrpl14	ENSMUSG00000023939
1	67.5367	comp56797_c0	exon5	441	Enpp5	ENSMUSG00000023960
1	67.5367	comp56421_c0	exon17	161	Enpp4	ENSMUSG00000023961
1	67.5367	comp63076_c0	exon2	625	Rrp36	ENSMUSG00000023971
1	67.5367	comp67322_c0	exon2	3355	Ubr2	ENSMUSG00000023977
1	67.5367	comp74262_c2	exon16	301	AI661453	ENSMUSG00000034382
1	67.5367	comp84625_c0	exon3	375	Cul7	ENSMUSG00000038545
1	67.5367	comp81776_c0	exon4	3615	Gpr110	ENSMUSG00000041293
1	67.5367	comp15506_c0	exon8	124	Cd2ap	ENSMUSG00000061665
1	67.5367	comp83644_c0	exon15	292	Trerf1	ENSMUSG00000064043
1	67.5367	comp79119_c1	exon3	1827	Xpo5	ENSMUSG00000067150
1	68.6072	comp74250_c1	exon3	765	Tjap1	ENSMUSG00000012296
1	68.6072	comp44683_c0	exon5	126	Tfeb	ENSMUSG00000023990
1	68.6072	comp74262_c2	exon16	278	AI661453	ENSMUSG00000034382
1	68.6072	comp79392_c1	exon1	1390	Dhx57	ENSMUSG00000035051
1	70.666	comp56176_c0	exon11	94	Supt3	ENSMUSG00000038954
1	70.666	comp64164_c0	exon23	149	Morc3	ENSMUSG00000039456
1	71.0804	comp75893_c0	exon32	212	Tbc1d5	ENSMUSG00000023923
1	71.0804	comp68190_c0	exon4	82	Rmdn2	ENSMUSG00000036368
1	71.0804	comp75426_c1	exon5	315	Atl2	ENSMUSG00000059811
1	73.6183	comp54511_c0	exon17	249	Igsf5	ENSMUSG00000000159
1	73.6183	comp85231_c0	exon14	852	Psmd2	ENSMUSG00000006998
1	73.6183	comp79690_c0	exon1	231	Dscr3	ENSMUSG00000022898
1	73.6183	comp53349_c0	exon1	660	Psmg1	ENSMUSG00000022913
1	73.6183	comp53349_c0	exon1	645	Psmg1	ENSMUSG00000022913
1	73.6183	comp81761_c0	exon1	191	Sh3bgr	ENSMUSG00000040666
1	73.6183	comp81761_c0	exon1	181	Sh3bgr	ENSMUSG00000040666
1	74.156	comp77425_c1	exon1	177	B3gnt5	ENSMUSG00000022686
1	74.156	comp77425_c1	exon1	193	B3gnt5	ENSMUSG00000022686
1	74.6936	comp15235_c0	exon1	1706	Ripk4	ENSMUSG00000005251
1	74.6936	comp16519_c0	exon11	468	Klhl22	ENSMUSG00000022750
1	74.6936	comp71113_c0	exon2	2462	Dgcr2	ENSMUSG00000003166
1	74.6936	comp84381_c0	exon2	1503	Dvl3	ENSMUSG00000003233
1	74.6936	comp17337_c0	exon2	1688	Abcf3	ENSMUSG00000003234
1	74.6936	comp78429_c0	exon11	210	Dgcr14	ENSMUSG00000003527
1	74.6936	comp85973_c0	exon6	800	Slc25a1	ENSMUSG00000003528
1	74.6936	comp81860_c0	exon3	1829	Pcyt1a	ENSMUSG00000005615
1	74.6936	comp16249_c0	exon24	187	Crkl	ENSMUSG00000006134
1	74.6936	comp68691_c0	exon15	245	Scarf2	ENSMUSG00000012017
1	74.6936	comp55565_c0	exon8	1084	Rnf168	ENSMUSG00000014074
1	74.6936	comp52848_c0	exon10	589	Serpind1	ENSMUSG00000022766
1	74.6936	comp78801_c0	exon1	141	Sdf2l1	ENSMUSG00000022769
1	74.6936	comp65618_c0	exon3	1114	Ppil2	ENSMUSG00000022771
1	74.6936	comp77261_c1	exon5	2577	Senp5	ENSMUSG00000022772
1	74.6936	comp83692_c0	exon33	241	Fgd4	ENSMUSG00000022788
1	74.6936	comp77856_c0	exon15	737	Tnk2	ENSMUSG00000022791
1	74.6936	comp80214_c1	exon2	1260	Tfrc	ENSMUSG00000022797
1	74.6936	comp74073_c0	exon33	465	Osbpl11	ENSMUSG00000022807
1	74.6936	comp74073_c0	exon33	473	Osbpl11	ENSMUSG00000022807
1	74.6936	comp81660_c0	exon2	617	Snx4	ENSMUSG00000022808
1	74.6936	comp77083_c0	exon2	470	Muc13	ENSMUSG00000022824
1	74.6936	comp56963_c0	exon1	727	Ap2m1	ENSMUSG00000022841
1	74.6936	comp83012_c0	exon17	170	Igf2bp2	ENSMUSG00000033581
1	74.6936	comp75965_c0	exon49	89	Vps8	ENSMUSG00000033653
1	74.6936	comp75965_c0	exon49	79	Vps8	ENSMUSG00000033653
1	74.6936	comp78623_c0	exon2	92	Parl	ENSMUSG00000033918
1	74.6936	comp69878_c0	exon2	1240	Leprel1	ENSMUSG00000038168
1	74.6936	comp69657_c0	exon2	349	Bace2	ENSMUSG00000040605
1	74.6936	comp77839_c0	exon8	504	Cldn5	ENSMUSG00000041378
1	74.6936	comp77681_c0	exon1	187	Pkp2	ENSMUSG00000041957
1	74.6936	comp77681_c0	exon1	199	Pkp2	ENSMUSG00000041957
1	74.6936	comp77681_c0	exon1	223	Pkp2	ENSMUSG00000041957
1	74.6936	comp84216_c0	exon18	688	Spidr	ENSMUSG00000041974
1	74.6936	comp68165_c1	exon1	918	Rtn4r	ENSMUSG00000043811
1	74.6936	comp79537_c0	exon5	794	Zbtb21	ENSMUSG00000046962
1	74.6936	comp74351_c0	exon1	1838	Acap2	ENSMUSG00000049076
1	74.6936	comp75457_c0	exon12	126	Kng2	ENSMUSG00000060459
1	74.6936	comp75457_c0	exon12	151	Kng2	ENSMUSG00000060459
1	74.6936	comp56512_c0	exon23	90	Mapk1	ENSMUSG00000063358
1	74.6936	comp76830_c1	exon21	141	Txnrd2	ENSMUSG00000075704
1	74.6936	comp65987_c0	exon8	550	Gm26635	ENSMUSG00000097764
1	74.6936	comp75743_c0	exon2	747	Dgcr8	ENSMUSG00000098643
1	75.7689	comp81042_c0	exon13	263	Efhc1	ENSMUSG00000041809
1	77.8151	comp85818_c0	exon1	766	Adprh	ENSMUSG00000002844
1	77.8151	comp72938_c0	exon4	61	Pla1a	ENSMUSG00000002847
1	77.8151	comp85350_c0	exon4	500	Fam162a	ENSMUSG00000003955
1	77.8151	comp74945_c1	exon2	1069	Tbccd1	ENSMUSG00000004462
1	77.8151	comp66003_c0	exon15	160	B4galt4	ENSMUSG00000022793
1	77.8151	comp85675_c0	exon2	571	Gsk3b	ENSMUSG00000022812
1	77.8151	comp73291_c1	exon3	38	Gtf2e1	ENSMUSG00000022828
1	77.8151	comp86758_c0	exon1	1293	Iqcb1	ENSMUSG00000022837
1	77.8151	comp85572_c0	exon2	1258	Dirc2	ENSMUSG00000022848
1	77.8151	comp16540_c0	exon13	124	Poglut1	ENSMUSG00000034064
1	77.8151	comp19255_c0	exon2	37	Sec22a	ENSMUSG00000034473
1	77.8151	comp66061_c0	exon3	119	Ptplb	ENSMUSG00000035376
1	77.8151	comp86848_c0	exon4	150	Upk1b	ENSMUSG00000049436
1	77.8151	comp74935_c0	exon3	1682	Dtx3l	ENSMUSG00000049502
1	78.4948	comp76065_c1	exon13	82	Zbtb11	ENSMUSG00000022601
1	78.4948	comp83440_c2	exon1	2382	Cblb	ENSMUSG00000022637
1	78.4948	comp80163_c0	exon14	87	Arl6	ENSMUSG00000022722
1	78.4948	comp80163_c0	exon14	63	Arl6	ENSMUSG00000022722
1	78.4948	comp80015_c0	exon4	424	Cldn25	ENSMUSG00000022744
1	78.4948	comp65370_c0	exon8	90	Cmss1	ENSMUSG00000022748
1	78.4948	comp79428_c3	exon1	1408	Tbc1d23	ENSMUSG00000022749
1	78.4948	comp55662_c0	exon2	274	Nit2	ENSMUSG00000022751
1	78.4948	comp83742_c0	exon2	170	Tfg	ENSMUSG00000022757
1	78.4948	comp64012_c0	exon6	1905	Igsf11	ENSMUSG00000022790
1	78.4948	comp71174_c0	exon1	1152	Pros1	ENSMUSG00000022912
1	78.4948	comp71174_c0	exon1	1173	Pros1	ENSMUSG00000022912
1	78.4948	comp54556_c0	exon26	144	BC016579	ENSMUSG00000033187
1	78.4948	comp75301_c0	exon21	303	Nfkbiz	ENSMUSG00000035356
1	78.4948	comp55423_c0	exon2	1389	Filip1l	ENSMUSG00000043336
1	78.4948	comp72727_c1	exon1	1038	2510009E07Rik	ENSMUSG00000043391
1	78.4948	comp21158_c0	exon6	130	Trmt10c	ENSMUSG00000044763
1	78.4948	comp77519_c1	exon4	1166	Zfp654	ENSMUSG00000047141
1	78.4948	comp76808_c2	exon1	603	Cd47	ENSMUSG00000055447
1	78.4948	comp78958_c0	exon18	82	4930453N24Rik	ENSMUSG00000059920
1	78.4948	comp80400_c0	exon2	405	Vgll3	ENSMUSG00000091243
1	79.7226	comp73015_c0	exon14	107	Arl13b	ENSMUSG00000022911
1	83.4881	comp81108_c1	exon2	2903	D16Ertd472e	ENSMUSG00000022864
1	83.4881	comp82889_c1	exon2	2091	Usp25	ENSMUSG00000022867
1	83.4881	comp85875_c0	exon5	101	Mrpl39	ENSMUSG00000022889
1	83.4881	comp66008_c0	exon7	148	Cct8	ENSMUSG00000025613
1	83.4881	comp74370_c0	exon14	166	Cyyr1	ENSMUSG00000041134
1	83.4881	comp80056_c4	exon23	91	Nrip1	ENSMUSG00000048490
1	83.4881	comp82029_c2	exon3	3525	Ltn1	ENSMUSG00000052299
1	84.2265	comp74161_c1	exon38	195	Slc5a6	ENSMUSG00000006641
1	84.2265	comp23916_c0	exon12	173	Ndufaf7	ENSMUSG00000024082
1	84.9777	comp67824_c0	exon6	112	Abhd1	ENSMUSG00000006638
1	84.9777	comp81350_c0	exon12	126	Cad	ENSMUSG00000013629
1	84.9777	comp85038_c0	exon3	405	Ppp1cb	ENSMUSG00000014956
1	84.9777	comp66384_c0	exon51	87	Itsn2	ENSMUSG00000020640
1	84.9777	comp78831_c0	exon21	341	Ncoa1	ENSMUSG00000020647
1	84.9777	comp55434_c0	exon14	187	Rab10	ENSMUSG00000020671
1	84.9777	comp85751_c0	exon2	343	Atp5o	ENSMUSG00000022956
1	84.9777	comp78141_c0	exon11	114	Donson	ENSMUSG00000022960
1	84.9777	comp16522_c0	exon2	767	Il10rb	ENSMUSG00000022969
1	84.9777	comp80351_c0	exon6	112	1110004E09Rik	ENSMUSG00000022972
1	84.9777	comp57339_c0	exon2	2143	Synj1	ENSMUSG00000022973
1	84.9777	comp85679_c0	exon2	321	Sod1	ENSMUSG00000022982
1	84.9777	comp51387_c0	exon1	1261	Scaf4	ENSMUSG00000022983
1	84.9777	comp66836_c0	exon1	225	Lbh	ENSMUSG00000024063
1	84.9777	comp47872_c0	exon1	2837	Spast	ENSMUSG00000024068
1	84.9777	comp56579_c0	exon2	2540	Crim1	ENSMUSG00000024074
1	84.9777	comp15788_c0	exon4	3088	Strn	ENSMUSG00000024077
1	84.9777	comp72166_c0	exon2	980	Ttc27	ENSMUSG00000024078
1	84.9777	comp23916_c0	exon12	174	Ndufaf7	ENSMUSG00000024082
1	84.9777	comp80505_c1	exon43	758	Bach1	ENSMUSG00000025612
1	84.9777	comp84597_c0	exon3	129	Fosl2	ENSMUSG00000029135
1	84.9777	comp84597_c0	exon3	127	Fosl2	ENSMUSG00000029135
1	84.9777	comp86614_c0	exon2	52	Rbks	ENSMUSG00000029136
1	84.9777	comp75050_c0	exon4	86	Mrpl33	ENSMUSG00000029142
1	84.9777	comp65075_c0	exon15	79	Slc30a3	ENSMUSG00000029151
1	84.9777	comp69869_c0	exon2	414	Sf3b6	ENSMUSG00000037361
1	84.9777	comp69869_c0	exon2	408	Sf3b6	ENSMUSG00000037361
1	84.9777	comp79803_c0	exon15	912	Asxl2	ENSMUSG00000037486
1	84.9777	comp85760_c0	exon25	314	Tmem214	ENSMUSG00000038828
1	84.9777	comp85760_c0	exon25	296	Tmem214	ENSMUSG00000038828
1	84.9777	comp15282_c0	exon26	124	Heatr5b	ENSMUSG00000039414
1	84.9777	comp15272_c0	exon8	290	Lclat1	ENSMUSG00000054469
1	84.9777	comp56816_c0	exon2	190	Cryzl1	ENSMUSG00000058240
1	84.9777	comp46151_c0	exon3	1835	Zfp512	ENSMUSG00000062761
1	84.9777	comp46151_c0	exon3	1866	Zfp512	ENSMUSG00000062761
1	84.9777	comp75868_c0	exon19	94	Rasgrp3	ENSMUSG00000071042
1	84.9777	comp75868_c0	exon19	88	Rasgrp3	ENSMUSG00000071042
1	85.5154	comp86356_c0	exon1	125	Ndufb4	ENSMUSG00000022820
1	85.5154	comp81993_c0	exon7	315	Slc35f6	ENSMUSG00000029175
1	86.053	comp77727_c0	exon1	1698	Itsn1	ENSMUSG00000022957
1	86.5795	comp84602_c0	exon39	157	Nbas	ENSMUSG00000020576
1	86.5795	comp67484_c0	exon12	116	Sdc1	ENSMUSG00000020592
1	86.5795	comp58383_c1	exon7	187	Rdh14	ENSMUSG00000020621
1	86.5795	comp66703_c0	exon16	816	Pxdn	ENSMUSG00000020674
1	86.5795	comp56725_c0	exon1	880	Kcns3	ENSMUSG00000043673
1	89.3393	comp74646_c0	exon6	238	Odc1	ENSMUSG00000011179
1	89.3393	comp66497_c1	exon1	1052	Pdia6	ENSMUSG00000020571
1	89.3393	comp56158_c0	exon3	89	Rock2	ENSMUSG00000020580
1	89.3393	comp75133_c0	exon24	470	Trappc12	ENSMUSG00000020628
1	89.3393	comp75133_c0	exon24	498	Trappc12	ENSMUSG00000020628
1	89.3393	comp45059_c0	exon4	611	Adi1	ENSMUSG00000020629
1	89.3393	comp45059_c0	exon4	613	Adi1	ENSMUSG00000020629
1	89.3393	comp45059_c0	exon4	644	Adi1	ENSMUSG00000020629
1	89.3393	comp78164_c0	exon19	148	Rsad2	ENSMUSG00000020641
1	89.3393	comp78164_c0	exon19	133	Rsad2	ENSMUSG00000020641
1	89.3393	comp73484_c0	exon13	124	Mboat2	ENSMUSG00000020646
1	89.3393	comp64842_c0	exon1	1130	Rrm2	ENSMUSG00000020649
1	89.3393	comp50107_c0	exon1	277	Sh3yl1	ENSMUSG00000020669
1	89.3393	comp76282_c3	exon2	313	Smad4	ENSMUSG00000024515
1	89.3393	comp86576_c0	exon10	87	Psmg2	ENSMUSG00000024537
1	89.3393	comp15795_c0	exon8	87	Ptpn2	ENSMUSG00000024539
1	89.3393	comp15795_c0	exon8	62	Ptpn2	ENSMUSG00000024539
1	89.3393	comp83998_c0	exon32	295	Cep192	ENSMUSG00000024542
1	89.3393	comp70292_c1	exon21	104	Nedd4l	ENSMUSG00000024589
1	89.3393	comp83682_c0	exon4	102	Fam110c	ENSMUSG00000036136
1	89.3393	comp14877_c0	exon14	85	Ska1	ENSMUSG00000036223
1	89.3393	comp79404_c0	exon1	3515	Kidins220	ENSMUSG00000036333
1	89.3393	comp86010_c0	exon6	1890	Mex3c	ENSMUSG00000037253
1	89.3393	comp72246_c0	exon12	571	Poli	ENSMUSG00000038425
1	89.3393	comp75890_c0	exon3	1266	Tmem241	ENSMUSG00000049411
1	89.3393	comp68308_c0	exon8	159	Lipg	ENSMUSG00000053846
1	89.3393	comp78017_c0	exon13	36	Taf1b	ENSMUSG00000059669
1	89.3393	comp78017_c0	exon13	74	Taf1b	ENSMUSG00000059669
1	89.3393	comp85035_c0	exon1	431	Rps7	ENSMUSG00000061477
1	89.3393	comp76453_c0	exon9	86	Iah1	ENSMUSG00000062054
1	89.3393	comp81312_c0	exon5	186	Hpcal1	ENSMUSG00000071379
1	89.3393	comp80022_c1	exon18	261	Apcdd1	ENSMUSG00000071847
1	96.8267	comp84047_c0	exon18	625	Afap1l1	ENSMUSG00000033032
1	96.8267	comp86241_c0	exon5	79	Hsd17b4	ENSMUSG00000024507
1	96.8267	comp20297_c0	exon25	99	Snx24	ENSMUSG00000024535
1	96.8267	comp15227_c0	exon2	955	Pcyox1l	ENSMUSG00000024579
1	96.8267	comp78005_c0	exon44	274	Napg	ENSMUSG00000024581
1	96.8267	comp81053_c0	exon8	85	Txnl1	ENSMUSG00000024583
1	96.8267	comp81053_c0	exon8	97	Txnl1	ENSMUSG00000024583
1	96.8267	comp55956_c0	exon1	1121	Lmnb1	ENSMUSG00000024590
1	96.8267	comp86392_c0	exon1	402	Prrc1	ENSMUSG00000024594
1	96.8267	comp69535_c0	exon27	345	Slc12a2	ENSMUSG00000024597
1	96.8267	comp21010_c0	exon2	1409	Dctn4	ENSMUSG00000024603
1	96.8267	comp21010_c0	exon2	1465	Dctn4	ENSMUSG00000024603
1	96.8267	comp65694_c1	exon33	147	Ablim3	ENSMUSG00000032735
1	96.8267	comp65694_c1	exon33	177	Ablim3	ENSMUSG00000032735
1	96.8267	comp84047_c0	exon18	650	Afap1l1	ENSMUSG00000033032
1	96.8267	comp84047_c0	exon18	647	Afap1l1	ENSMUSG00000033032
1	96.8267	comp56197_c0	exon1	2240	Slc26a2	ENSMUSG00000034320
1	96.8267	comp72388_c0	exon3	588	Smim3	ENSMUSG00000038059
1	96.8267	comp77429_c3	exon22	180	Atp8b1	ENSMUSG00000039529
1	96.8267	comp80957_c0	exon41	148	Wdr7	ENSMUSG00000040560
1	96.8267	comp80891_c0	exon1	1715	Lman1	ENSMUSG00000041891
1	96.8267	comp80891_c0	exon1	1721	Lman1	ENSMUSG00000041891
1	96.8267	comp70299_c0	exon17	50	Fbxo38	ENSMUSG00000042211
1	96.8267	comp70299_c0	exon17	26	Fbxo38	ENSMUSG00000042211
1	96.8267	comp83901_c2	exon3	4739	Zfp532	ENSMUSG00000042439
1	96.8267	comp84460_c0	exon1	2508	Arhgef37	ENSMUSG00000045094
1	96.8267	comp65334_c0	exon3	850	Sh3tc2	ENSMUSG00000045629
1	96.8267	comp56317_c0	exon32	90	Cep120	ENSMUSG00000048799
1	96.8267	comp84150_c0	exon5	708	Ndst1	ENSMUSG00000054008
1	96.8267	comp56198_c1	exon1	370	Csnk1g3	ENSMUSG00000073563
1	101.734	comp86241_c0	exon5	118	Hsd17b4	ENSMUSG00000024507
1	101.734	comp58679_c0	exon36	249	Lox	ENSMUSG00000024529
1	101.734	comp83778_c0	exon22	290	Sncaip	ENSMUSG00000024534
1	101.734	comp83778_c0	exon22	291	Sncaip	ENSMUSG00000024534
1	101.734	comp55566_c0	exon5	758	Fem1c	ENSMUSG00000033319
1	101.734	comp83320_c0	exon10	256	Trim36	ENSMUSG00000033949
1	101.734	comp82850_c0	exon5	4408	Dmxl1	ENSMUSG00000037416
1	101.734	comp69207_c0	exon3	331	Gm5039	ENSMUSG00000093847
1	103.92	comp55626_c0	exon49	449	Spry4	ENSMUSG00000024427
1	103.92	comp16000_c0	exon3	1254	Lars	ENSMUSG00000024493
1	103.92	comp53685_c0	exon1	441	Dpysl3	ENSMUSG00000024501
1	103.92	comp75729_c0	exon20	139	Mcc	ENSMUSG00000071856
1	107.821	comp87019_c0	exon3	1235	Hars2	ENSMUSG00000019143
1	107.821	comp48535_c0	exon2	2429	Pcdh12	ENSMUSG00000024440
1	108.359	comp75079_c0	exon1	152	Ndfip1	ENSMUSG00000024425
1	108.359	comp55626_c0	exon49	465	Spry4	ENSMUSG00000024427
1	108.359	comp15991_c0	exon4	2166	Pcdh1	ENSMUSG00000051375
1	108.359	comp81113_c0	exon5	128	Gnpda1	ENSMUSG00000052102
1	108.359	comp85799_c0	exon8	250	Hars	ENSMUSG00000001380
1	108.359	comp85799_c0	exon8	249	Hars	ENSMUSG00000001380
1	108.359	comp85799_c0	exon8	219	Hars	ENSMUSG00000001380
1	108.359	comp65165_c0	exon7	464	Psd2	ENSMUSG00000024347
1	108.359	comp85711_c0	exon20	96	Hdac3	ENSMUSG00000024454
1	108.359	comp41077_c0	exon45	124	Fchsd1	ENSMUSG00000038524
1	108.359	comp71534_c1	exon2	830	Taf7	ENSMUSG00000051316
1	108.359	comp82819_c2	exon4	2443	PCDHA9	ENSMUSG00000102697
1	109.996	comp49208_c0	exon1	1475	Brd8	ENSMUSG00000003778
1	109.996	comp78916_c0	exon2	5042	Apc	ENSMUSG00000005871
1	109.996	comp71310_c0	exon1	2156	Sap130	ENSMUSG00000024260
1	109.996	comp71310_c0	exon1	2194	Sap130	ENSMUSG00000024260
1	109.996	comp15337_c0	exon2	343	Slc23a1	ENSMUSG00000024354
1	109.996	comp77745_c5	exon4	1529	Bin1	ENSMUSG00000024381
1	109.996	comp18779_c0	exon12	85	Ercc3	ENSMUSG00000024382
1	109.996	comp70830_c0	exon40	76	Map3k2	ENSMUSG00000024383
1	109.996	comp67319_c1	exon4	165	Iws1	ENSMUSG00000024384
1	109.996	comp67319_c1	exon4	174	Iws1	ENSMUSG00000024384
1	109.996	comp67319_c1	exon4	144	Iws1	ENSMUSG00000024384
1	109.996	comp73624_c0	exon2	2136	Lims2	ENSMUSG00000024395
1	109.996	comp78073_c0	exon1	38	Paip2	ENSMUSG00000037058
1	109.996	comp84893_c0	exon5	790	Ctnna1	ENSMUSG00000037815
1	109.996	comp70523_c0	exon40	644	Kdm3b	ENSMUSG00000038773
1	115.652	comp56242_c0	exon2	219	Slc39a6	ENSMUSG00000024270
1	115.652	comp82110_c0	exon1	1726	2700062C07Rik	ENSMUSG00000024273
1	115.652	comp69317_c0	exon1	927	Zfp397	ENSMUSG00000024276
1	115.652	comp76303_c0	exon14	426	Mocos	ENSMUSG00000039616
1	115.652	comp76303_c0	exon14	431	Mocos	ENSMUSG00000039616
1	115.652	comp76303_c0	exon14	423	Mocos	ENSMUSG00000039616
1	115.652	comp79856_c0	exon1	3245	Garem	ENSMUSG00000042680
1	115.652	comp79856_c0	exon1	3270	Garem	ENSMUSG00000042680
1	115.652	comp79856_c0	exon1	3277	Garem	ENSMUSG00000042680
1	115.652	comp84165_c0	exon1	2092	Dsg2	ENSMUSG00000044393
1	124.622	comp85555_c0	exon18	77	Riok3	ENSMUSG00000024404
1	124.622	comp85365_c0	exon11	103	Npc1	ENSMUSG00000024413
1	124.622	comp85730_c0	exon6	1658	Ttc39c	ENSMUSG00000024424
1	124.622	comp77352_c0	exon5	2052	Osbpl1a	ENSMUSG00000044252
1	127.329	comp81383_c0	exon2	45	Abhd3	ENSMUSG00000002475
1	127.329	comp15472_c0	exon1	324	Rbbp8	ENSMUSG00000041238
1	127.329	comp83649_c0	exon2	2202	Greb1l	ENSMUSG00000042942
1	128.963	comp56214_c0	exon9	281	Smad7	ENSMUSG00000025880
1	128.963	comp56849_c0	exon1	1276	Ctif	ENSMUSG00000052928
1	128.963	comp56849_c0	exon1	1287	Ctif	ENSMUSG00000052928
1	128.963	comp56849_c0	exon1	1305	Ctif	ENSMUSG00000052928
1	133.877	comp77891_c0	exon3	46	Timm21	ENSMUSG00000024645
1	133.877	comp85455_c0	exon4	114	Ier3ip1	ENSMUSG00000090000
1	135.496	comp70719_c0	exon9	320	Fam69c	ENSMUSG00000047992
1	135.496	comp70719_c0	exon9	316	Fam69c	ENSMUSG00000047992
1	135.496	comp84498_c0	exon1	4334	Zfp407	ENSMUSG00000048410
1	135.496	comp80114_c2	exon14	683	Zfp516	ENSMUSG00000058881
2	0	comp39638_c0	exon29	395	Arhgef16	ENSMUSG00000029032
2	0	comp79508_c0	exon22	102	Mib2	ENSMUSG00000029060
2	4.7045	comp70120_c0	exon4	192	Ube2j2	ENSMUSG00000023286
2	4.7045	comp75988_c0	exon8	137	Acot7	ENSMUSG00000028937
2	4.7045	comp66025_c0	exon38	370	Nol9	ENSMUSG00000028948
2	4.7045	comp66025_c0	exon38	407	Nol9	ENSMUSG00000028948
2	4.7045	comp80085_c0	exon8	218	Zbtb48	ENSMUSG00000028952
2	4.7045	comp79178_c0	exon6	174	Agtrap	ENSMUSG00000029007
2	4.7045	comp56605_c1	exon13	106	Cpsf3l	ENSMUSG00000029034
2	4.7045	comp79508_c0	exon22	118	Mib2	ENSMUSG00000029060
2	4.7045	comp82910_c0	exon4	556	Mmp23	ENSMUSG00000029061
2	4.7045	comp79251_c0	exon1	607	Nadk	ENSMUSG00000029063
2	4.7045	comp78038_c0	exon9	202	Mxra8	ENSMUSG00000029070
2	4.7045	comp76607_c1	exon26	291	Dvl1	ENSMUSG00000029071
2	4.7045	comp76607_c1	exon26	262	Dvl1	ENSMUSG00000029071
2	4.7045	comp18860_c0	exon2	165	Sdf4	ENSMUSG00000029076
2	4.7045	comp18860_c0	exon2	201	Sdf4	ENSMUSG00000029076
2	4.7045	comp83212_c1	exon4	161	Thap3	ENSMUSG00000039759
2	4.7045	comp63604_c0	exon6	2221	Slc35e2	ENSMUSG00000042202
2	4.7045	comp55997_c0	exon1	1275	B3galt6	ENSMUSG00000050796
2	4.7045	comp68278_c0	exon19	160	Kif1b	ENSMUSG00000063077
2	4.7045	comp76020_c0	exon1	324	Aurkaip1	ENSMUSG00000065990
2	4.7045	comp76020_c0	exon1	345	Aurkaip1	ENSMUSG00000065990
2	4.7045	comp76020_c0	exon1	327	Aurkaip1	ENSMUSG00000065990
2	4.7045	comp76020_c0	exon1	354	Aurkaip1	ENSMUSG00000065990
2	4.7045	comp15064_c0	exon11	86	2610002J02Rik	ENSMUSG00000073684
2	4.7045	comp15064_c0	exon11	89	2610002J02Rik	ENSMUSG00000073684
2	4.7045	comp15064_c0	exon11	94	2610002J02Rik	ENSMUSG00000073684
2	4.7045	comp85976_c0	exon8	124	Pdpn	ENSMUSG00000096951
2	4.7045	comp76330_c1	exon9	89	Icmt	ENSMUSG00000039662
2	5.24214	comp46118_c0	exon16	257	Vamp3	ENSMUSG00000028955
2	5.77976	comp85117_c0	exon24	342	Pgd	ENSMUSG00000028961
2	5.77976	comp85117_c0	exon24	308	Pgd	ENSMUSG00000028961
2	5.77976	comp83287_c0	exon9	388	Pex14	ENSMUSG00000028975
2	5.77976	comp15327_c0	exon8	258	Slc25a33	ENSMUSG00000028982
2	5.77976	comp71406_c0	exon1	120	Ctnnbip1	ENSMUSG00000028988
2	5.77976	comp71406_c0	exon1	140	Ctnnbip1	ENSMUSG00000028988
2	5.77976	comp71406_c0	exon1	118	Ctnnbip1	ENSMUSG00000028988
2	5.77976	comp77824_c0	exon68	72	Mtor	ENSMUSG00000028991
2	5.77976	comp68354_c0	exon1	2092	Clcn6	ENSMUSG00000029016
2	5.77976	comp68354_c0	exon1	2101	Clcn6	ENSMUSG00000029016
2	5.77976	comp76330_c1	exon9	104	Icmt	ENSMUSG00000039662
2	6.86104	comp84662_c1	exon2	6352	Vps13d	ENSMUSG00000020220
2	6.86104	comp77210_c0	exon3	727	Lzic	ENSMUSG00000028990
2	6.86104	comp80085_c0	exon8	255	Zbtb48	ENSMUSG00000028952
2	6.86104	comp85414_c0	exon1	553	Tprgl	ENSMUSG00000029030
2	6.86104	comp85414_c0	exon1	543	Tprgl	ENSMUSG00000029030
2	7.39879	comp85468_c0	exon5	86	Mfn2	ENSMUSG00000029020
2	7.39879	comp85976_c0	exon8	125	Pdpn	ENSMUSG00000096951
2	11.2901	comp82131_c0	exon3	164	Ddi2	ENSMUSG00000078515
2	11.2901	comp82131_c0	exon3	143	Ddi2	ENSMUSG00000078515
2	11.8196	comp79684_c1	exon4	1113	Fblim1	ENSMUSG00000006219
2	11.8196	comp65058_c0	exon3	119	Fbxo42	ENSMUSG00000028920
2	11.8196	comp82131_c0	exon3	130	Ddi2	ENSMUSG00000078515
2	14.0145	comp76196_c0	exon4	278	Snip1	ENSMUSG00000050213
2	14.0145	comp85485_c0	exon6	414	Wnt4	ENSMUSG00000036856
2	14.0145	comp84093_c0	exon25	87	Emc1	ENSMUSG00000078517
2	15.0985	comp82295_c0	exon1	777	Lypla2	ENSMUSG00000028670
2	15.0985	comp68377_c0	exon48	114	Ubr4	ENSMUSG00000066036
2	17.8283	comp83955_c0	exon5	976	Luzp1	ENSMUSG00000001089
2	17.8283	comp85100_c0	exon1	725	Cdc42	ENSMUSG00000006699
2	17.8283	comp82788_c0	exon5	1377	E2f2	ENSMUSG00000018983
2	17.8283	comp64760_c1	exon3	459	Fuca1	ENSMUSG00000028673
2	17.8283	comp83429_c0	exon4	1062	Hp1bp3	ENSMUSG00000028759
2	17.8283	comp83429_c0	exon4	1101	Hp1bp3	ENSMUSG00000028759
2	17.8283	comp83301_c0	exon3	253	Alpl	ENSMUSG00000028766
2	17.8283	comp85485_c0	exon6	390	Wnt4	ENSMUSG00000036856
2	17.8283	comp85485_c0	exon6	381	Wnt4	ENSMUSG00000036856
2	17.8283	comp76467_c0	exon34	300	Myom3	ENSMUSG00000037139
2	17.8283	comp83651_c0	exon2	966	Ece1	ENSMUSG00000057530
2	23.8701	comp81066_c0	exon1	1775	Sdc3	ENSMUSG00000025743
2	23.8701	comp81066_c0	exon1	1827	Sdc3	ENSMUSG00000025743
2	23.8701	comp81066_c0	exon1	1764	Sdc3	ENSMUSG00000025743
2	23.8701	comp79498_c0	exon5	70	Trnau1ap	ENSMUSG00000028898
2	23.8701	comp72927_c0	exon1	1302	Gmeb1	ENSMUSG00000028901
2	23.8701	comp73311_c2	exon10	296	Srsf4	ENSMUSG00000028911
2	23.8701	comp85178_c0	exon1	727	Dnajc8	ENSMUSG00000054405
2	23.8701	comp86627_c0	exon4	480	Med18	ENSMUSG00000066042
2	23.8701	comp82152_c0	exon9	64	9930104L06Rik	ENSMUSG00000044730
2	29.0757	comp74807_c0	exon3	998	Sync	ENSMUSG00000001333
2	29.0757	comp75587_c0	exon19	158	Tinagl1	ENSMUSG00000028776
2	29.0757	comp85419_c0	exon11	228	Pef1	ENSMUSG00000028779
2	29.0757	comp86522_c0	exon2	377	Rnf19b	ENSMUSG00000028793
2	29.0757	comp72013_c0	exon1	1303	Phc2	ENSMUSG00000028796
2	29.0757	comp85451_c0	exon13	167	Eif3i	ENSMUSG00000028798
2	29.0757	comp63163_c0	exon6	1389	AU040320	ENSMUSG00000028830
2	29.0757	comp56390_c0	exon7	115	Psmb2	ENSMUSG00000028837
2	29.0757	comp85518_c0	exon6	108	Trappc3	ENSMUSG00000028847
2	29.0757	comp85099_c0	exon5	152	Nudc	ENSMUSG00000028851
2	29.0757	comp85099_c0	exon5	188	Nudc	ENSMUSG00000028851
2	29.0757	comp45146_c0	exon6	213	Ago1	ENSMUSG00000041530
2	29.0757	comp24036_c0	exon1	740	Gjb3	ENSMUSG00000042367
2	29.0757	comp24036_c0	exon1	764	Gjb3	ENSMUSG00000042367
2	29.0757	comp45951_c0	exon3	341	Smim12	ENSMUSG00000042380
2	29.0757	comp74988_c0	exon22	165	Clspn	ENSMUSG00000042489
2	29.0757	comp74988_c0	exon22	149	Clspn	ENSMUSG00000042489
2	29.0757	comp73364_c0	exon9	621	Gja4	ENSMUSG00000050234
2	29.0757	comp82155_c0	exon9	118	C77080	ENSMUSG00000050390
2	29.0757	comp82155_c0	exon9	109	C77080	ENSMUSG00000050390
2	29.0757	comp77590_c0	exon1	152	Tmem39b	ENSMUSG00000053730
2	29.0757	comp82620_c2	exon4	962	Txlna	ENSMUSG00000053841
2	29.0757	comp82620_c2	exon4	947	Txlna	ENSMUSG00000053841
2	31.2688	comp49048_c0	exon19	60	Gpatch3	ENSMUSG00000028850
2	31.2688	comp15440_c0	exon1	631	Stx12	ENSMUSG00000028879
2	31.2688	comp66070_c0	exon8	78	Eya3	ENSMUSG00000028886
2	31.2688	comp83725_c0	exon6	119	Wdtc1	ENSMUSG00000037622
2	32.2657	comp73255_c0	exon2	3707	Arid1a	ENSMUSG00000007880
2	32.2657	comp84483_c1	exon28	321	Dhdds	ENSMUSG00000012117
2	32.2657	comp81532_c0	exon19	32	Aim1l	ENSMUSG00000012123
2	32.2657	comp69859_c0	exon23	109	Tmem57	ENSMUSG00000028826
2	32.2657	comp81243_c1	exon26	575	Extl1	ENSMUSG00000028838
2	32.2657	comp69646_c0	exon5	489	Zfp593	ENSMUSG00000028840
2	32.2657	comp82830_c2	exon5	640	Mtfr1l	ENSMUSG00000046671
2	32.2657	comp71352_c0	exon17	90	Lin28a	ENSMUSG00000050966
2	32.2657	comp74157_c2	exon2	1739	Sepn1	ENSMUSG00000050989
2	36.5818	comp50741_c0	exon14	110	Adprhl2	ENSMUSG00000042558
2	42.2645	comp21526_c0	exon13	246	Gnl2	ENSMUSG00000028869
2	42.2645	comp78444_c1	exon3	162	Mtf1	ENSMUSG00000028890
2	42.2645	comp74412_c0	exon2	1549	Inpp5b	ENSMUSG00000028894
2	42.2645	comp63613_c0	exon50	503	Nt5c1a	ENSMUSG00000054958
2	42.2645	comp63613_c0	exon50	530	Nt5c1a	ENSMUSG00000054958
2	43.3196	comp73740_c0	exon15	159	Trit1	ENSMUSG00000028653
2	43.3196	comp56373_c0	exon2	389	Cap1	ENSMUSG00000028656
2	44.9589	comp56373_c0	exon2	425	Cap1	ENSMUSG00000028656
2	44.9589	comp86453_c0	exon19	149	Smap2	ENSMUSG00000032870
2	44.9589	comp51626_c0	exon2	1189	Zmpste24	ENSMUSG00000043207
2	44.9589	comp73664_c0	exon11	686	Rlf	ENSMUSG00000049878
2	44.9589	comp87090_c0	exon2	701	Zfp69	ENSMUSG00000064141
2	45.5007	comp41331_c0	exon1	463	Slc2a1	ENSMUSG00000028645
2	46.0481	comp67277_c0	exon1	464	Cmpk1	ENSMUSG00000028719
2	46.5889	comp15226_c0	exon11	66	Dmap1	ENSMUSG00000009640
2	46.5889	comp75456_c1	exon6	158	Dph2	ENSMUSG00000028540
2	46.5889	comp85558_c0	exon6	117	Urod	ENSMUSG00000028684
2	46.5889	comp76696_c1	exon3	899	Toe1	ENSMUSG00000028688
2	46.5889	comp55331_c0	exon2	934	Mmachc	ENSMUSG00000028690
2	46.5889	comp67349_c0	exon2	63	Nasp	ENSMUSG00000028693
2	46.5889	comp65403_c0	exon16	216	Ipp	ENSMUSG00000028696
2	46.5889	comp16372_c0	exon1	1414	Nsun4	ENSMUSG00000028706
2	46.5889	comp21587_c0	exon14	167	Atpaf1	ENSMUSG00000028710
2	46.5889	comp21587_c0	exon14	188	Atpaf1	ENSMUSG00000028710
2	46.5889	comp72977_c0	exon1	1072	Cyp4b1	ENSMUSG00000028713
2	46.5889	comp84668_c0	exon2	3843	Ptprf	ENSMUSG00000033295
2	46.5889	comp78040_c0	exon1	2156	Kdm4a	ENSMUSG00000033326
2	46.5889	comp78040_c0	exon1	2170	Kdm4a	ENSMUSG00000033326
2	46.5889	comp41445_c0	exon2	489	Zfp691	ENSMUSG00000045268
2	47.134	comp20322_c0	exon2	470	Eif2b3	ENSMUSG00000028683
2	47.134	comp76851_c0	exon13	76	Mknk1	ENSMUSG00000028708
2	48.7814	comp83066_c0	exon2	407	Faf1	ENSMUSG00000010517
2	48.7814	comp70729_c0	exon6	515	Rnf11	ENSMUSG00000028557
2	48.7814	comp82280_c0	exon1	839	Calr4	ENSMUSG00000028558
2	48.7814	comp83937_c0	exon30	70	Cc2d1b	ENSMUSG00000028582
2	48.7814	comp66590_c0	exon1	89	Nrd1	ENSMUSG00000053510
2	49.3126	comp85260_c0	exon21	833	Scp2	ENSMUSG00000028603
2	49.3126	comp86629_c0	exon8	369	Cpt2	ENSMUSG00000028607
2	49.3126	comp80427_c0	exon6	73	Fam151a	ENSMUSG00000034871
2	49.3126	comp75758_c0	exon19	94	Dhcr24	ENSMUSG00000034926
2	49.3126	comp73315_c0	exon13	772	Pars2	ENSMUSG00000043572
2	52.7268	comp85207_c0	exon8	90	Pgm2	ENSMUSG00000025791
2	52.7268	comp78827_c0	exon3	2991	Usp24	ENSMUSG00000028514
2	52.7268	comp71421_c0	exon24	103	Jak1	ENSMUSG00000028530
2	52.7268	comp56020_c0	exon8	353	Oma1	ENSMUSG00000035069
2	52.7268	comp83745_c6	exon1	974	Alg6	ENSMUSG00000073792
2	54.3553	comp85207_c0	exon8	69	Pgm2	ENSMUSG00000025791
2	54.3553	comp15236_c0	exon45	113	Slc35d1	ENSMUSG00000028521
2	54.3553	comp74162_c4	exon3	619	Leprot	ENSMUSG00000035212
2	60.599	comp68313_c0	exon11	150	Ptplad2	ENSMUSG00000028497
2	60.599	comp64493_c0	exon2	1844	Atg4c	ENSMUSG00000028550
2	60.599	comp73739_c0	exon42	100	Hook1	ENSMUSG00000028572
2	60.599	comp74637_c1	exon3	42	Fggy	ENSMUSG00000028573
2	60.599	comp71355_c0	exon12	372	Caap1	ENSMUSG00000028578
2	60.599	comp81223_c2	exon19	115	Kank4	ENSMUSG00000035407
2	60.599	comp83149_c0	exon3	156	Acer2	ENSMUSG00000038007
2	60.599	comp80658_c0	exon21	209	Inadl	ENSMUSG00000061859
2	60.599	comp82604_c0	exon2	331	L1td1	ENSMUSG00000087166
2	70.6589	comp86273_c0	exon7	90	Ugcg	ENSMUSG00000028381
2	70.6589	comp49031_c0	exon21	1618	Ptbp3	ENSMUSG00000028382
2	70.6589	comp85726_c0	exon2	576	Hsdl2	ENSMUSG00000028383
2	70.6589	comp21741_c0	exon13	281	Snx30	ENSMUSG00000028385
2	70.6589	comp78849_c0	exon23	184	Bspry	ENSMUSG00000028392
2	70.6589	comp73231_c0	exon2	1241	Kdm4c	ENSMUSG00000028397
2	70.6589	comp68443_c0	exon43	105	Mpdz	ENSMUSG00000028402
2	70.6589	comp84642_c5	exon4	444	Zdhhc21	ENSMUSG00000028403
2	70.6589	comp73212_c0	exon3	887	Plin2	ENSMUSG00000028494
2	70.6589	comp70305_c0	exon2	179	Hdhd3	ENSMUSG00000038422
2	70.6589	comp84178_c0	exon34	79	Cdk5rap2	ENSMUSG00000039298
2	70.6589	comp84430_c0	exon19	16	Col27a1	ENSMUSG00000045672
2	70.6589	comp82147_c2	exon26	139	Rgs3	ENSMUSG00000059810
2	70.6589	comp82147_c2	exon26	163	Rgs3	ENSMUSG00000059810
2	70.6589	comp15934_c0	exon1	965	Slc31a1	ENSMUSG00000066150
2	70.6589	comp84087_c0	exon3	2119	Fkbp15	ENSMUSG00000066151
2	70.6589	comp86048_c0	exon14	171	Slc31a2	ENSMUSG00000066152
2	71.1965	comp20176_c0	exon12	517	Klf4	ENSMUSG00000003032
2	71.1965	comp75242_c0	exon18	162	Tgfbr1	ENSMUSG00000007613
2	71.1965	comp84470_c0	exon3	100	Abca1	ENSMUSG00000015243
2	71.1965	comp15202_c0	exon3	562	Nipsnap3b	ENSMUSG00000015247
2	71.1965	comp56540_c0	exon5	103	Exosc3	ENSMUSG00000028322
2	71.1965	comp56540_c0	exon5	133	Exosc3	ENSMUSG00000028322
2	71.1965	comp86076_c0	exon6	65	Ncbp1	ENSMUSG00000028330
2	71.1965	comp85146_c0	exon2	623	Anp32b	ENSMUSG00000028333
2	71.1965	comp85146_c0	exon2	637	Anp32b	ENSMUSG00000028333
2	71.1965	comp85643_c0	exon2	306	Nans	ENSMUSG00000028334
2	71.1965	comp84817_c0	exon1	1252	Rad23b	ENSMUSG00000028426
2	71.1965	comp63048_c0	exon1	1191	Epb4.1l4b	ENSMUSG00000028434
2	71.1965	comp15066_c0	exon3	1399	Tdrd7	ENSMUSG00000035517
2	71.1965	comp85761_c0	exon8	955	Aldh1b1	ENSMUSG00000035561
2	71.1965	comp78933_c1	exon7	215	Dcaf10	ENSMUSG00000035572
2	71.1965	comp78933_c1	exon7	179	Dcaf10	ENSMUSG00000035572
2	71.1965	comp69938_c0	exon8	1248	Tmem246	ENSMUSG00000039611
2	71.1965	comp82388_c3	exon1	1133	Stx17	ENSMUSG00000061455
2	71.1965	comp72634_c1	exon12	123	Anks6	ENSMUSG00000066191
2	71.1965	comp72634_c1	exon12	108	Anks6	ENSMUSG00000066191
2	71.1965	comp85444_c0	exon1	130	Tomm5	ENSMUSG00000078713
2	71.1965	comp85444_c0	exon1	121	Tomm5	ENSMUSG00000078713
2	73.353	comp73377_c0	exon9	103	Atp6v0d2	ENSMUSG00000028238
2	73.353	comp73377_c0	exon9	102	Atp6v0d2	ENSMUSG00000028238
2	73.353	comp84288_c0	exon10	660	Casp8ap2	ENSMUSG00000028282
2	73.353	comp76964_c3	exon16	108	Tln1	ENSMUSG00000028465
2	73.353	comp79934_c0	exon5	90	Gba2	ENSMUSG00000028467
2	73.353	comp72025_c0	exon65	164	N28178	ENSMUSG00000036062
2	73.353	comp55547_c0	exon1	1118	Arhgap24	ENSMUSG00000057315
2	73.353	comp81927_c0	exon5	723	Rbm47	ENSMUSG00000070780
2	73.353	comp56330_c0	exon10	104	Nrarp	ENSMUSG00000078202
2	73.353	comp86616_c0	exon6	78	Slc35a1	ENSMUSG00000028293
2	73.353	comp84997_c0	exon26	121	Erp44	ENSMUSG00000028343
2	73.353	comp51005_c0	exon3	760	Chmp5	ENSMUSG00000028419
2	73.353	comp78481_c1	exon16	719	Ubap1	ENSMUSG00000028437
2	73.353	comp86903_c0	exon3	111	Nudt2	ENSMUSG00000028443
2	73.353	comp76709_c1	exon2	259	Pigo	ENSMUSG00000028454
2	73.353	comp49969_c0	exon35	116	Reck	ENSMUSG00000028476
2	73.353	comp85507_c0	exon24	227	Glipr2	ENSMUSG00000028480
2	73.353	comp82697_c0	exon15	237	Zcchc7	ENSMUSG00000035649
2	73.353	comp61331_c1	exon12	329	Dnajb5	ENSMUSG00000036052
2	73.353	comp61331_c1	exon12	342	Dnajb5	ENSMUSG00000036052
2	73.353	comp72025_c0	exon65	137	N28178	ENSMUSG00000036062
2	73.353	comp67569_c0	exon6	277	Galt	ENSMUSG00000036073
2	73.353	comp70286_c0	exon4	49	Rpp25l	ENSMUSG00000036114
2	73.353	comp82304_c2	exon9	1917	Zfp292	ENSMUSG00000039967
2	73.353	comp56161_c0	exon3	40	Lyrm2	ENSMUSG00000045854
2	73.353	comp84503_c0	exon2	1089	Zbtb5	ENSMUSG00000049657
2	73.353	comp84297_c0	exon2	2515	Akna	ENSMUSG00000039158
2	76.0593	comp80712_c0	exon23	122	Corin	ENSMUSG00000005220
2	76.0593	comp42830_c0	exon11	298	Fbxw5	ENSMUSG00000015095
2	76.0593	comp48333_c0	exon1	1208	Nbn	ENSMUSG00000028224
2	76.0593	comp48333_c0	exon1	1220	Nbn	ENSMUSG00000028224
2	76.0593	comp73377_c0	exon9	138	Atp6v0d2	ENSMUSG00000028238
2	76.0593	comp84151_c0	exon8	166	Aco1	ENSMUSG00000028405
2	76.0593	comp64882_c0	exon4	1762	Fktn	ENSMUSG00000028414
2	76.0593	comp63810_c0	exon1	1650	Rfc1	ENSMUSG00000029191
2	76.0593	comp16283_c0	exon12	173	Lias	ENSMUSG00000029199
2	76.0593	comp75826_c0	exon7	42	Gnpda2	ENSMUSG00000029209
2	76.0593	comp85670_c0	exon1	552	Commd8	ENSMUSG00000029213
2	76.0593	comp17661_c0	exon4	529	Lnx1	ENSMUSG00000029228
2	76.0593	comp15954_c0	exon2	310	Polr2b	ENSMUSG00000029250
2	76.0593	comp79362_c1	exon1	1066	Coq2	ENSMUSG00000029319
2	76.0593	comp55234_c0	exon8	511	Naaa	ENSMUSG00000029413
2	76.0593	comp82697_c0	exon15	214	Zcchc7	ENSMUSG00000035649
2	76.0593	comp55797_c0	exon11	62	Srp72	ENSMUSG00000036323
2	76.0593	comp15505_c0	exon6	139	1110008P14Rik	ENSMUSG00000039195
2	76.0593	comp80589_c0	exon2	2292	Wwp1	ENSMUSG00000041058
2	76.0593	comp80589_c0	exon2	2321	Wwp1	ENSMUSG00000041058
2	76.0593	comp77857_c0	exon5	195	Ripk2	ENSMUSG00000041135
2	76.0593	comp40828_c0	exon8	713	Osgin2	ENSMUSG00000041153
2	76.0593	comp66749_c0	exon2	2615	Atp10d	ENSMUSG00000046808
2	76.0593	comp69891_c0	exon15	136	2021-09-11	ENSMUSG00000058013
2	76.0593	comp84838_c0	exon5	251	Hopx	ENSMUSG00000059325
2	76.0593	comp55552_c0	exon41	148	Kdr	ENSMUSG00000062960
2	76.0593	comp80025_c0	exon9	123	Ccl27b	ENSMUSG00000096826
2	78.4367	comp48597_c1	exon1	493	Mob1b	ENSMUSG00000006262
2	78.4367	comp56974_c0	exon5	99	Slc2a8	ENSMUSG00000026791
2	78.4367	comp64766_c0	exon4	1427	Cenpc1	ENSMUSG00000029253
2	78.4367	comp86401_c0	exon21	118	Ccng2	ENSMUSG00000029385
2	78.4367	comp72447_c2	exon7	137	Cdkl2	ENSMUSG00000029403
2	78.4367	comp45115_c0	exon8	60	Mrpl1	ENSMUSG00000029486
2	78.4367	comp86531_c0	exon7	604	Nup54	ENSMUSG00000034826
2	78.4367	comp86531_c0	exon7	638	Nup54	ENSMUSG00000034826
2	78.4367	comp76947_c0	exon27	220	Parm1	ENSMUSG00000034981
2	78.4367	comp56735_c0	exon2	950	Cox18	ENSMUSG00000035505
2	78.4367	comp56735_c0	exon2	939	Cox18	ENSMUSG00000035505
2	78.4367	comp20110_c0	exon4	1253	Sowahb	ENSMUSG00000045314
2	78.4367	comp84690_c0	exon17	88	Afp	ENSMUSG00000054932
2	78.4367	comp69891_c0	exon15	101	2021-09-11	ENSMUSG00000058013
2	78.4367	comp82562_c0	exon2	79	Ccni	ENSMUSG00000063015
2	78.4367	comp16271_c0	exon1	811	Ugt2b36	ENSMUSG00000070704
2	78.4367	comp71466_c0	exon22	79	Gm26582	ENSMUSG00000097479
2	79.1665	comp79197_c0	exon2	1389	Idua	ENSMUSG00000033540
2	79.1665	comp54745_c0	exon1	1981	Angptl2	ENSMUSG00000004105
2	79.1665	comp54745_c0	exon1	1983	Angptl2	ENSMUSG00000004105
2	79.1665	comp15385_c0	exon4	203	Fgfrl1	ENSMUSG00000008090
2	79.1665	comp73506_c1	exon4	177	Pdcl	ENSMUSG00000009030
2	79.1665	comp60495_c1	exon8	177	Cdk9	ENSMUSG00000009555
2	79.1665	comp77127_c0	exon15	349	Tmem175	ENSMUSG00000013495
2	79.1665	comp66900_c0	exon6	1689	Surf4	ENSMUSG00000014867
2	79.1665	comp81345_c1	exon47	464	Zbtb43	ENSMUSG00000026788
2	79.1665	comp81345_c1	exon47	486	Zbtb43	ENSMUSG00000026788
2	79.1665	comp74078_c1	exon13	203	Fam129b	ENSMUSG00000026796
2	79.1665	comp78015_c0	exon2	1765	Ttf1	ENSMUSG00000026803
2	79.1665	comp68959_c0	exon16	91	Usp20	ENSMUSG00000026854
2	79.1665	comp45271_c0	exon3	1202	Psmd5	ENSMUSG00000026869
2	79.1665	comp78861_c0	exon4	1203	Sec16a	ENSMUSG00000026924
2	79.1665	comp81722_c0	exon1	91	Arrdc1	ENSMUSG00000026972
2	79.1665	comp64959_c0	exon10	144	Pigg	ENSMUSG00000029263
2	79.1665	comp56616_c0	exon33	235	Dr1	ENSMUSG00000029265
2	79.1665	comp61456_c0	exon27	66	Mtf2	ENSMUSG00000029267
2	79.1665	comp61456_c0	exon27	44	Mtf2	ENSMUSG00000029267
2	79.1665	comp68750_c1	exon1	933	Fam69a	ENSMUSG00000029270
2	79.1665	comp86935_c0	exon14	246	Sparcl1	ENSMUSG00000029309
2	79.1665	comp84260_c0	exon12	65	Nudt9	ENSMUSG00000029310
2	79.1665	comp83553_c0	exon16	76	Klhl8	ENSMUSG00000029312
2	79.1665	comp69399_c0	exon6	509	Aff1	ENSMUSG00000029313
2	79.1665	comp69399_c0	exon6	520	Aff1	ENSMUSG00000029313
2	79.1665	comp83267_c0	exon1	421	Enoph1	ENSMUSG00000029326
2	79.1665	comp78261_c0	exon12	187	Pcgf3	ENSMUSG00000033623
2	79.1665	comp78694_c1	exon11	139	Rpap2	ENSMUSG00000033773
2	79.1665	comp78694_c1	exon11	109	Rpap2	ENSMUSG00000033773
2	79.1665	comp86486_c0	exon3	771	Bmp2k	ENSMUSG00000034663
2	79.1665	comp84680_c0	exon89	525	Fras1	ENSMUSG00000034687
2	79.1665	comp84680_c0	exon89	522	Fras1	ENSMUSG00000034687
2	79.1665	comp84680_c0	exon89	484	Fras1	ENSMUSG00000034687
2	79.1665	comp84680_c0	exon89	532	Fras1	ENSMUSG00000034687
2	79.1665	comp83745_c1	exon4	523	Hpse	ENSMUSG00000035273
2	79.1665	comp75649_c0	exon1	246	Cops4	ENSMUSG00000035297
2	79.1665	comp77277_c0	exon25	212	Dennd1a	ENSMUSG00000035392
2	79.1665	comp81984_c0	exon10	112	Mapkap1	ENSMUSG00000038696
2	79.1665	comp78984_c0	exon62	90	Mvb12b	ENSMUSG00000038740
2	79.1665	comp84365_c0	exon1	1748	Fam102a	ENSMUSG00000039157
2	79.1665	comp83458_c0	exon9	64	Pomt1	ENSMUSG00000039254
2	79.1665	comp86245_c0	exon2	1294	Lrrc8d	ENSMUSG00000046079
2	79.1665	comp75731_c0	exon18	463	Stbd1	ENSMUSG00000047963
2	79.1665	comp75731_c0	exon18	433	Stbd1	ENSMUSG00000047963
2	79.1665	comp75731_c0	exon18	462	Stbd1	ENSMUSG00000047963
2	79.1665	comp82791_c1	exon19	220	Zfp644	ENSMUSG00000049606
2	79.1665	comp80826_c1	exon2	871	Paqr3	ENSMUSG00000055725
2	79.1665	comp83533_c0	exon4	1186	Lrrc8b	ENSMUSG00000070639
2	79.1665	comp46432_c0	exon2	1226	Rabepk	ENSMUSG00000070953
2	79.1665	comp85989_c0	exon3	1017	Dolk	ENSMUSG00000075419
2	79.1665	comp80650_c0	exon7	478	St6galnac4	ENSMUSG00000079442
2	80.2476	comp15456_c0	exon21	81	Uck1	ENSMUSG00000002550
2	80.2476	comp15456_c0	exon21	84	Uck1	ENSMUSG00000002550
2	80.2476	comp83934_c0	exon5	87	Ndor1	ENSMUSG00000006471
2	80.2476	comp85886_c0	exon5	184	Nelfb	ENSMUSG00000013465
2	80.2476	comp75330_c0	exon22	67	Clic3	ENSMUSG00000015093
2	80.2476	comp80736_c0	exon4	80	Rxra	ENSMUSG00000015846
2	80.2476	comp77886_c0	exon27	207	Gle1	ENSMUSG00000019715
2	80.2476	comp78015_c0	exon2	1802	Ttf1	ENSMUSG00000026803
2	80.2476	comp73304_c0	exon67	384	Col5a1	ENSMUSG00000026837
2	80.2476	comp82615_c0	exon4	136	Tor1b	ENSMUSG00000026848
2	80.2476	comp74119_c0	exon1	1511	Crat	ENSMUSG00000026853
2	80.2476	comp74119_c0	exon1	1550	Crat	ENSMUSG00000026853
2	80.2476	comp68959_c0	exon16	128	Usp20	ENSMUSG00000026854
2	80.2476	comp79881_c0	exon1	115	Agpat2	ENSMUSG00000026922
2	80.2476	comp16394_c0	exon8	140	Pmpca	ENSMUSG00000026926
2	80.2476	comp16034_c0	exon19	405	Anapc2	ENSMUSG00000026965
2	80.2476	comp49152_c0	exon3	519	Zmynd19	ENSMUSG00000026974
2	80.2476	comp49152_c0	exon3	534	Zmynd19	ENSMUSG00000026974
2	80.2476	comp82813_c0	exon5	120	Psd4	ENSMUSG00000026979
2	80.2476	comp78404_c2	exon4	2928	Gtf3c4	ENSMUSG00000035666
2	80.2476	comp48966_c0	exon11	256	Ubac1	ENSMUSG00000036352
2	80.2476	comp67767_c0	exon9	148	Phpt1	ENSMUSG00000036504
2	80.2476	comp46859_c0	exon5	157	Mrpl41	ENSMUSG00000036850
2	80.2476	comp20889_c0	exon6	342	Asb6	ENSMUSG00000039483
2	80.2476	comp20889_c0	exon6	368	Asb6	ENSMUSG00000039483
2	80.2476	comp50376_c0	exon2	437	Ppp2r4	ENSMUSG00000039515
2	80.2476	comp77316_c0	exon1	590	Tbc1d13	ENSMUSG00000039678
2	80.2476	comp77717_c0	exon1	1554	Zer1	ENSMUSG00000039686
2	80.2476	comp84145_c1	exon17	88	Rapgef1	ENSMUSG00000039844
2	80.2476	comp74540_c0	exon24	491	Tprn	ENSMUSG00000048707
2	80.2476	comp84146_c0	exon1	2102	Tor4a	ENSMUSG00000059555
2	80.2476	comp84146_c0	exon1	2139	Tor4a	ENSMUSG00000059555
2	80.2476	comp56858_c0	exon14	643	C330006A16Rik	ENSMUSG00000087679
2	80.2476	comp15184_c0	exon2	1528	Uap1l1	ENSMUSG00000026956
2	80.7852	comp82424_c0	exon1	437	Scarb2	ENSMUSG00000029426
2	80.7852	comp73864_c0	exon2	124	D2Wsu81e	ENSMUSG00000039660
2	80.7852	comp73864_c0	exon2	137	D2Wsu81e	ENSMUSG00000039660
2	80.7852	comp73864_c0	exon2	133	D2Wsu81e	ENSMUSG00000039660
2	80.7852	comp73853_c0	exon2	158	Wdr34	ENSMUSG00000039715
2	82.4041	comp78155_c0	exon3	524	Arl5a	ENSMUSG00000036093
2	82.4041	comp81966_c2	exon8	4505	Rif1	ENSMUSG00000036202
2	82.4041	comp84388_c0	exon3	5523	Mbd5	ENSMUSG00000036792
2	82.4041	comp83383_c0	exon10	118	Gtdc1	ENSMUSG00000036890
2	82.4041	comp83090_c1	exon1	827	Cercam	ENSMUSG00000039787
2	82.4041	comp86195_c0	exon27	263	Stam2	ENSMUSG00000055371
2	82.4041	comp86195_c0	exon27	245	Stam2	ENSMUSG00000055371
2	82.4041	comp47769_c0	exon15	998	Epc2	ENSMUSG00000069495
2	82.4041	comp78368_c1	exon3	58	Ntmt1	ENSMUSG00000026857
2	82.4041	comp72665_c0	exon5	122	Wdsub1	ENSMUSG00000026988
2	83.4652	comp56318_c0	exon11	83	Gpd2	ENSMUSG00000026827
2	83.4652	comp85487_c0	exon1	413	Psmd14	ENSMUSG00000026914
2	83.4652	comp77214_c0	exon23	129	2021-03-07	ENSMUSG00000026977
2	83.4652	comp83668_c1	exon1	1997	Baz2b	ENSMUSG00000026987
2	83.4652	comp56335_c0	exon22	253	Stk39	ENSMUSG00000027030
2	83.4652	comp86917_c0	exon7	81	Cd302	ENSMUSG00000060703
2	86.8117	comp73030_c0	exon2	2318	Pdk1	ENSMUSG00000006494
2	86.8117	comp85281_c0	exon9	314	Gorasp2	ENSMUSG00000014959
2	86.8117	comp80939_c0	exon6	403	Nfe2l2	ENSMUSG00000015839
2	86.8117	comp67580_c0	exon1	1589	Dync1i2	ENSMUSG00000027012
2	86.8117	comp79691_c0	exon8	7145	Lrp2	ENSMUSG00000027070
2	86.8117	comp78977_c1	exon1	1655	Fastkd1	ENSMUSG00000027086
2	86.8117	comp68719_c0	exon14	788	Phospho2	ENSMUSG00000027088
2	86.8117	comp67906_c0	exon6	62	Nostrin	ENSMUSG00000034738
2	86.8117	comp71920_c2	exon7	310	Klhl23	ENSMUSG00000042155
2	86.8117	comp69016_c1	exon2	1582	Wipf1	ENSMUSG00000075284
2	87.8728	comp78755_c0	exon3	1368	Scrn3	ENSMUSG00000008226
2	87.8728	comp86001_c0	exon1	416	Atp5g3	ENSMUSG00000018770
2	87.8728	comp53903_c0	exon8	723	Slc25a12	ENSMUSG00000027010
2	87.8728	comp53903_c0	exon8	693	Slc25a12	ENSMUSG00000027010
2	87.8728	comp79762_c0	exon4	517	Mtx2	ENSMUSG00000027099
2	87.8728	comp55431_c0	exon1	1152	Atf2	ENSMUSG00000027104
2	87.8728	comp85324_c0	exon1	1395	Arhgap1	ENSMUSG00000027247
2	87.8728	comp85324_c0	exon1	1402	Arhgap1	ENSMUSG00000027247
2	90.0677	comp15238_c0	exon2	166	Slc39a13	ENSMUSG00000002105
2	90.0677	comp69238_c0	exon4	100	Nr1h3	ENSMUSG00000002108
2	90.0677	comp67086_c0	exon1	691	Ddb2	ENSMUSG00000002109
2	90.0677	comp67903_c0	exon1	1931	Celf1	ENSMUSG00000005506
2	90.0677	comp67903_c0	exon1	1920	Celf1	ENSMUSG00000005506
2	90.0677	comp86977_c0	exon1	446	Rcn1	ENSMUSG00000005973
2	90.0677	comp69924_c0	exon6	1852	Fnbp4	ENSMUSG00000008200
2	90.0677	comp67937_c0	exon11	847	Ssfa2	ENSMUSG00000027007
2	90.0677	comp84103_c0	exon5	85	Ssrp1	ENSMUSG00000027067
2	90.0677	comp81656_c0	exon10	345	Zc3h15	ENSMUSG00000027091
2	90.0677	comp31378_c0	exon6	201	Pamr1	ENSMUSG00000027188
2	90.0677	comp56557_c0	exon2	738	Ttc17	ENSMUSG00000027194
2	90.0677	comp56557_c0	exon2	744	Ttc17	ENSMUSG00000027194
2	90.0677	comp78680_c1	exon2	119	Creb3l1	ENSMUSG00000027230
2	90.0677	comp84567_c0	exon2	1317	Harbi1	ENSMUSG00000027243
2	90.0677	comp86904_c0	exon12	67	F2	ENSMUSG00000027249
2	90.0677	comp78059_c0	exon15	702	Tnks1bp1	ENSMUSG00000033955
2	90.0677	comp84490_c2	exon19	386	Zdhhc5	ENSMUSG00000034075
2	90.0677	comp78407_c0	exon13	100	Alkbh3	ENSMUSG00000040174
2	90.0677	comp15187_c0	exon5	851	Slc35c1	ENSMUSG00000049922
2	90.0677	comp65504_c0	exon1	1776	Phf21a	ENSMUSG00000058318
2	90.0677	comp86244_c0	exon3	135	Ptpmt1	ENSMUSG00000063235
2	91.1347	comp45478_c0	exon7	92	Serping1	ENSMUSG00000023224
2	91.1347	comp45478_c0	exon7	129	Serping1	ENSMUSG00000023224
2	91.1347	comp64577_c0	exon3	1626	Nat10	ENSMUSG00000027185
2	91.1347	comp72919_c0	exon4	109	2700094K13Rik	ENSMUSG00000076437
2	92.771	comp80194_c1	exon13	175	Pdhx	ENSMUSG00000010914
2	92.771	comp15454_c0	exon4	217	Commd9	ENSMUSG00000027163
2	92.771	comp77257_c0	exon3	73	Caprin1	ENSMUSG00000027184
2	92.771	comp64461_c0	exon3	620	Trim44	ENSMUSG00000027189
2	92.771	comp80536_c0	exon36	94	Abtb2	ENSMUSG00000032724
2	92.771	comp80536_c0	exon36	92	Abtb2	ENSMUSG00000032724
2	92.771	comp47486_c0	exon6	115	Prr5l	ENSMUSG00000032841
2	92.771	comp47486_c0	exon6	134	Prr5l	ENSMUSG00000032841
2	92.771	comp76231_c0	exon3	1815	Qser1	ENSMUSG00000074994
2	97.7995	comp77560_c0	exon5	1253	Chp1	ENSMUSG00000014077
2	97.7995	comp86278_c0	exon1	1282	Slc12a6	ENSMUSG00000027130
2	97.7995	comp48890_c0	exon12	169	Emc4	ENSMUSG00000027131
2	97.7995	comp55407_c0	exon24	202	Katnbl1	ENSMUSG00000027132
2	97.7995	comp80485_c0	exon5	1043	Ccdc34	ENSMUSG00000027160
2	97.7995	comp69932_c0	exon9	1808	Lin7c	ENSMUSG00000027162
2	97.7995	comp69932_c0	exon9	1811	Lin7c	ENSMUSG00000027162
2	97.7995	comp15304_c0	exon2	1179	Lrrc57	ENSMUSG00000027286
2	97.7995	comp86220_c0	exon12	463	Rtf1	ENSMUSG00000027304
2	97.7995	comp86220_c0	exon12	431	Rtf1	ENSMUSG00000027304
2	97.7995	comp86220_c0	exon12	456	Rtf1	ENSMUSG00000027304
2	97.7995	comp71235_c0	exon1	279	Ndufaf1	ENSMUSG00000027305
2	97.7995	comp68762_c0	exon23	131	Dll4	ENSMUSG00000027314
2	97.7995	comp68762_c0	exon23	96	Dll4	ENSMUSG00000027314
2	97.7995	comp56713_c0	exon1	2186	Rasgrp1	ENSMUSG00000027347
2	97.7995	comp84616_c1	exon2	2865	Spred1	ENSMUSG00000027351
2	97.7995	comp63935_c0	exon11	181	Gabpb1	ENSMUSG00000027361
2	97.7995	comp73990_c0	exon18	153	Mapkbp1	ENSMUSG00000033902
2	97.7995	comp80563_c0	exon63	460	Mga	ENSMUSG00000033943
2	97.7995	comp78864_c0	exon1	2112	Ino80	ENSMUSG00000034154
2	97.7995	comp78252_c1	exon1	1841	Tmx4	ENSMUSG00000034723
2	97.7995	comp86396_c0	exon1	144	Ccdc32	ENSMUSG00000039983
2	97.7995	comp76297_c0	exon18	64	BC052040	ENSMUSG00000040282
2	97.7995	comp15071_c0	exon6	2115	Aqr	ENSMUSG00000040383
2	97.7995	comp68468_c0	exon17	161	A430105I19Rik	ENSMUSG00000045838
2	97.7995	comp86060_c0	exon1	131	Emc7	ENSMUSG00000055943
2	97.7995	comp57535_c0	exon4	170	Dph6	ENSMUSG00000057147
2	97.7995	comp84481_c0	exon16	491	Pak6	ENSMUSG00000074923
2	97.7995	comp78361_c0	exon1	633	1700020I14Rik	ENSMUSG00000085438
2	97.7995	comp64309_c0	exon9	93	Jmjd7	ENSMUSG00000098789
2	99.3983	comp81857_c0	exon3	1101	Sqrdl	ENSMUSG00000005803
2	99.3983	comp68554_c0	exon12	150	Gatm	ENSMUSG00000027199
2	99.3983	comp68554_c0	exon12	137	Gatm	ENSMUSG00000027199
2	99.3983	comp65367_c1	exon10	249	Galk2	ENSMUSG00000027207
2	99.3983	comp65367_c1	exon10	262	Galk2	ENSMUSG00000027207
2	99.3983	comp65367_c1	exon10	226	Galk2	ENSMUSG00000027207
2	99.3983	comp55727_c0	exon22	74	Slc28a2	ENSMUSG00000027219
2	99.3983	comp75286_c0	exon1	1829	Wdr76	ENSMUSG00000027242
2	99.3983	comp75286_c0	exon1	1794	Wdr76	ENSMUSG00000027242
2	99.3983	comp15666_c0	exon9	252	Pdia3	ENSMUSG00000027248
2	99.3983	comp74864_c0	exon4	2393	Ubr1	ENSMUSG00000027272
2	99.3983	comp84413_c0	exon34	79	Cdan1	ENSMUSG00000027284
2	99.3983	comp75524_c0	exon2	541	Zfp106	ENSMUSG00000027288
2	99.3983	comp80380_c0	exon2	1979	Stard7	ENSMUSG00000027367
2	99.3983	comp55991_c0	exon15	1647	Prom2	ENSMUSG00000027376
2	99.3983	comp71133_c0	exon5	47	Fbln7	ENSMUSG00000027386
2	99.3983	comp84212_c0	exon41	100	Ttl	ENSMUSG00000027394
2	99.3983	comp43841_c0	exon7	1236	Slc20a1	ENSMUSG00000027397
2	99.3983	comp57000_c0	exon11	104	Il1b	ENSMUSG00000027398
2	99.3983	comp57000_c0	exon11	72	Il1b	ENSMUSG00000027398
2	99.3983	comp56062_c0	exon10	178	Shf	ENSMUSG00000033256
2	99.3983	comp82454_c0	exon1	3635	Spg11	ENSMUSG00000033396
2	99.3983	comp79217_c1	exon14	253	Ctdspl2	ENSMUSG00000033411
2	99.3983	comp79217_c1	exon14	228	Ctdspl2	ENSMUSG00000033411
2	99.3983	comp51700_c0	exon3	909	Tmem87a	ENSMUSG00000033808
2	99.3983	comp51700_c0	exon3	914	Tmem87a	ENSMUSG00000033808
2	99.3983	comp64800_c0	exon2	1551	Secisbp2l	ENSMUSG00000035093
2	99.3983	comp87197_c0	exon3	85	Slc24a5	ENSMUSG00000035183
2	99.3983	comp50890_c0	exon5	97	Chchd5	ENSMUSG00000037938
2	99.3983	comp75335_c0	exon3	2131	Zscan29	ENSMUSG00000050619
2	99.3983	comp78098_c3	exon3	189	B2m	ENSMUSG00000060802
2	99.3983	comp68937_c1	exon1	764	Ap5s1	ENSMUSG00000068264
2	99.3983	comp56524_c0	exon15	431	Hspa12b	ENSMUSG00000074793
2	99.3983	comp83377_c0	exon6	514	Lcmt2	ENSMUSG00000074890
2	104.31	comp74828_c0	exon33	365	Eif2ak4	ENSMUSG00000005102
2	104.31	comp66654_c0	exon33	110	Slc23a2	ENSMUSG00000027340
2	104.31	comp66654_c0	exon33	128	Slc23a2	ENSMUSG00000027340
2	104.31	comp17878_c0	exon5	965	Nop56	ENSMUSG00000027405
2	104.31	comp77824_c1	exon1	919	Erv3	ENSMUSG00000037482
2	104.31	comp73249_c1	exon3	1099	Pank2	ENSMUSG00000037514
2	104.31	comp75172_c0	exon11	506	Mavs	ENSMUSG00000037523
2	104.31	comp70276_c0	exon12	254	Lzts3	ENSMUSG00000037703
2	104.31	comp70276_c0	exon12	218	Lzts3	ENSMUSG00000037703
2	104.31	comp71176_c0	exon12	64	Pced1a	ENSMUSG00000037773
2	104.31	comp63409_c0	exon5	248	1110034G24Rik	ENSMUSG00000044991
2	104.31	comp56524_c0	exon15	452	Hspa12b	ENSMUSG00000074793
2	104.31	comp56524_c0	exon15	461	Hspa12b	ENSMUSG00000074793
2	112.495	comp86128_c0	exon15	186	Crnkl1	ENSMUSG00000001767
2	112.495	comp70851_c0	exon1	464	Rin2	ENSMUSG00000001768
2	112.495	comp71656_c0	exon2	74	Rrbp1	ENSMUSG00000027422
2	112.495	comp74684_c0	exon3	1271	Rrbp1	ENSMUSG00000027422
2	112.495	comp55989_c1	exon3	1423	Polr3f	ENSMUSG00000027427
2	112.495	comp55989_c1	exon3	1406	Polr3f	ENSMUSG00000027427
2	112.495	comp80398_c0	exon3	98	Dtd1	ENSMUSG00000027430
2	112.495	comp75067_c0	exon2	149	Gins1	ENSMUSG00000027454
2	112.495	comp76541_c0	exon2	184	Abhd12	ENSMUSG00000032046
2	112.495	comp76875_c0	exon2	1189	Pygb	ENSMUSG00000033059
2	112.495	comp76875_c0	exon2	1210	Pygb	ENSMUSG00000033059
2	112.495	comp65061_c0	exon8	73	Apmap	ENSMUSG00000033096
2	112.495	comp84610_c0	exon2	3558	Ralgapa2	ENSMUSG00000037110
2	112.495	comp78686_c1	exon3	319	Kif16b	ENSMUSG00000038844
2	112.495	comp56534_c0	exon1	634	Tasp1	ENSMUSG00000039033
2	112.495	comp53014_c0	exon11	1612	Flrt3	ENSMUSG00000051379
2	112.495	comp15255_c0	exon1	843	Nanp	ENSMUSG00000053916
2	112.495	comp82401_c0	exon1	1253	Zfp341	ENSMUSG00000059842
2	115.159	comp76956_c0	exon2	577	Rem1	ENSMUSG00000000359
2	115.159	comp16259_c0	exon18	248	Snx5	ENSMUSG00000027423
2	115.159	comp81082_c0	exon8	106	Sdcbp2	ENSMUSG00000027456
2	115.159	comp79957_c0	exon10	1070	Fam110a	ENSMUSG00000027459
2	115.159	comp21256_c0	exon5	862	Trib3	ENSMUSG00000032715
2	115.159	comp48425_c0	exon32	147	Entpd6	ENSMUSG00000033068
2	115.694	comp63826_c0	exon3	767	Kif3b	ENSMUSG00000027475
2	115.694	comp77187_c0	exon2	289	Snta1	ENSMUSG00000027488
2	115.694	comp84070_c0	exon1	1099	Itch	ENSMUSG00000027598
2	115.694	comp74320_c0	exon16	173	Trp53inp2	ENSMUSG00000038375
2	115.694	comp16573_c0	exon2	843	Pigu	ENSMUSG00000038383
2	115.694	comp16573_c0	exon2	817	Pigu	ENSMUSG00000038383
2	115.694	comp56822_c0	exon15	84	Tm9sf4	ENSMUSG00000068040
2	119.323	comp86634_c0	exon21	96	Acss2	ENSMUSG00000027605
2	119.323	comp69861_c0	exon24	499	Aar2	ENSMUSG00000027628
2	119.323	comp69861_c0	exon24	451	Aar2	ENSMUSG00000027628
2	119.323	comp65488_c0	exon1	1900	Ncoa6	ENSMUSG00000038369
2	120.181	comp86139_c0	exon6	443	Gss	ENSMUSG00000027610
2	120.181	comp68866_c0	exon6	22	Eif6	ENSMUSG00000027613
2	120.181	comp57157_c0	exon1	1533	Nfs1	ENSMUSG00000027618
2	120.181	comp57157_c0	exon1	1544	Nfs1	ENSMUSG00000027618
2	120.181	comp75978_c0	exon45	138	Epb4.1l1	ENSMUSG00000027624
2	120.181	comp74320_c0	exon16	157	Trp53inp2	ENSMUSG00000038375
2	120.181	comp83712_c0	exon6	191	Dlgap4	ENSMUSG00000061689
2	120.181	comp80829_c0	exon5	138	Cpne1	ENSMUSG00000074643
2	121.267	comp68894_c0	exon1	1377	Ndrg3	ENSMUSG00000027634
2	121.267	comp85230_c0	exon3	291	1110008F13Rik	ENSMUSG00000027637
2	121.267	comp84304_c0	exon2	4786	Soga1	ENSMUSG00000055485
2	121.267	comp55736_c0	exon7	50	Blcap	ENSMUSG00000067787
2	121.267	comp55736_c0	exon7	33	Blcap	ENSMUSG00000067787
2	121.784	comp69993_c0	exon16	76	Lbp	ENSMUSG00000016024
2	121.784	comp51392_c0	exon1	2035	Tti1	ENSMUSG00000027650
2	121.784	comp80269_c0	exon16	335	Tgm2	ENSMUSG00000037820
2	121.784	comp75041_c0	exon11	131	Arhgap40	ENSMUSG00000074625
2	121.784	comp75041_c0	exon11	130	Arhgap40	ENSMUSG00000074625
2	125.735	comp80916_c0	exon4	683	Srsf6	ENSMUSG00000016921
2	125.735	comp71032_c0	exon3	2941	Plcg1	ENSMUSG00000016933
2	125.735	comp69194_c0	exon3	79	Sdc4	ENSMUSG00000017009
2	125.735	comp70933_c0	exon41	180	Ttpal	ENSMUSG00000017679
2	125.735	comp70933_c0	exon41	216	Ttpal	ENSMUSG00000017679
2	125.735	comp70933_c0	exon41	182	Ttpal	ENSMUSG00000017679
2	125.735	comp70933_c0	exon41	220	Ttpal	ENSMUSG00000017679
2	125.735	comp16687_c0	exon13	201	Serinc3	ENSMUSG00000017707
2	125.735	comp16687_c0	exon13	211	Serinc3	ENSMUSG00000017707
2	125.735	comp74717_c1	exon1	1048	Dbndd2	ENSMUSG00000017734
2	125.735	comp83610_c0	exon1	2858	Jph2	ENSMUSG00000017817
2	125.735	comp79527_c0	exon1	2104	Lpin3	ENSMUSG00000027412
2	125.735	comp85384_c0	exon8	290	Oser1	ENSMUSG00000035399
2	125.735	comp81853_c0	exon1	4305	Zhx3	ENSMUSG00000035877
2	125.735	comp69858_c0	exon12	104	Zfp335	ENSMUSG00000039834
2	125.735	comp69858_c0	exon12	118	Zfp335	ENSMUSG00000039834
2	125.735	comp69858_c0	exon12	69	Zfp335	ENSMUSG00000039834
2	125.735	comp67518_c0	exon1	477	Sys1	ENSMUSG00000045503
2	125.735	comp84643_c1	exon2	3944	Chd6	ENSMUSG00000057133
2	125.735	comp43890_c0	exon25	304	Top1	ENSMUSG00000070544
2	126.279	comp67554_c0	exon43	102	Hnf4a	ENSMUSG00000017950
2	129.552	comp86333_c0	exon21	284	Elmo2	ENSMUSG00000017670
2	129.552	comp79364_c0	exon23	809	Slc2a10	ENSMUSG00000027661
2	129.552	comp69858_c0	exon12	129	Zfp335	ENSMUSG00000039834
2	129.552	comp81018_c2	exon14	375	Snx21	ENSMUSG00000050373
2	130.631	comp81711_c0	exon2	223	Sulf2	ENSMUSG00000006800
2	130.631	comp74589_c0	exon31	412	Ncoa3	ENSMUSG00000027678
2	130.631	comp64132_c0	exon8	74	Tmem189	ENSMUSG00000090213
2	131.165	comp79442_c1	exon1	1139	Ptgis	ENSMUSG00000017969
2	131.165	comp79442_c1	exon1	1124	Ptgis	ENSMUSG00000017969
2	131.165	comp77088_c1	exon2	87	Ptpn1	ENSMUSG00000027540
2	131.165	comp71494_c0	exon12	1247	Znfx1	ENSMUSG00000039501
2	131.165	comp73805_c0	exon57	176	Prex1	ENSMUSG00000039621
2	131.165	comp69012_c0	exon1	914	Pard6b	ENSMUSG00000044641
2	131.165	comp78453_c0	exon1	4316	Adnp	ENSMUSG00000051149
2	131.165	comp79200_c1	exon2	1024	Mocs3	ENSMUSG00000074576
2	131.165	comp81065_c1	exon16	129	Fam65c	ENSMUSG00000074577
2	131.703	comp48548_c0	exon2	681	Cstf1	ENSMUSG00000027498
2	131.703	comp80002_c0	exon8	338	Tfap2c	ENSMUSG00000028640
2	133.898	comp56219_c0	exon1	673	Rbm38	ENSMUSG00000027510
2	133.898	comp16145_c0	exon3	156	Pfdn4	ENSMUSG00000052033
2	133.898	comp21018_c0	exon7	2623	Zfp217	ENSMUSG00000052056
2	134.965	comp84208_c0	exon29	167	Rab22a	ENSMUSG00000027519
2	134.965	comp50936_c0	exon20	130	Stx16	ENSMUSG00000027522
2	134.965	comp74810_c0	exon5	370	Zgpat	ENSMUSG00000027582
2	136.596	comp81915_c0	exon6	169	Tpd52l2	ENSMUSG00000000827
2	136.596	comp55848_c0	exon16	426	Tpd52l2	ENSMUSG00000000827
2	136.596	comp76705_c0	exon1	796	Rgs19	ENSMUSG00000002458
2	136.596	comp15997_c0	exon32	86	Nelfcd	ENSMUSG00000016253
2	136.596	comp15997_c0	exon32	62	Nelfcd	ENSMUSG00000016253
2	136.596	comp15997_c0	exon32	73	Nelfcd	ENSMUSG00000016253
2	136.596	comp85605_c0	exon1	344	Gid8	ENSMUSG00000027573
2	136.596	comp74454_c0	exon1	1514	Polr3k	ENSMUSG00000038628
2	136.596	comp77517_c0	exon2	519	Ythdf1	ENSMUSG00000038848
2	136.596	comp85925_c0	exon9	317	Slco4a1	ENSMUSG00000038963
2	136.596	comp81151_c0	exon1	1160	Mtg2	ENSMUSG00000039069
2	136.596	comp81151_c0	exon1	1157	Mtg2	ENSMUSG00000039069
2	136.596	comp15332_c0	exon12	61	Taf4a	ENSMUSG00000039117
2	136.596	comp19795_c0	exon13	298	Ogfr	ENSMUSG00000049401
3	1.14585	comp71261_c0	exon12	103	Rab24	ENSMUSG00000034789
3	2.26429	comp83484_c1	exon22	176	Ptch1	ENSMUSG00000021466
3	2.26429	comp80898_c0	exon40	211	Ercc6l2	ENSMUSG00000021470
3	2.26429	comp80898_c0	exon40	215	Ercc6l2	ENSMUSG00000021470
3	2.26429	comp76825_c1	exon33	424	Naa35	ENSMUSG00000021555
3	2.26429	comp76825_c1	exon33	461	Naa35	ENSMUSG00000021555
3	2.26429	comp76825_c1	exon33	419	Naa35	ENSMUSG00000021555
3	2.26429	comp76825_c1	exon33	471	Naa35	ENSMUSG00000021555
3	2.26429	comp81384_c0	exon2	547	Hiatl1	ENSMUSG00000038212
3	2.26429	comp81384_c0	exon2	571	Hiatl1	ENSMUSG00000038212
3	4.45858	comp80505_c0	exon3	222	Dbn1	ENSMUSG00000034675
3	4.98791	comp76021_c0	exon10	137	Pdlim7	ENSMUSG00000021493
3	5.52563	comp76660_c0	exon11	264	Sema4d	ENSMUSG00000021451
3	5.52563	comp63719_c0	exon2	33	Gadd45g	ENSMUSG00000021453
3	5.52563	comp80697_c0	exon5	106	Iars	ENSMUSG00000037851
3	5.52563	comp80697_c0	exon5	100	Iars	ENSMUSG00000037851
3	9.52983	comp58360_c0	exon1	2486	Kif13a	ENSMUSG00000021375
3	9.52983	comp56397_c0	exon1	1289	Dek	ENSMUSG00000021377
3	9.52983	comp41400_c0	exon2	242	Id4	ENSMUSG00000021379
3	9.52983	comp43608_c0	exon17	120	Ippk	ENSMUSG00000021385
3	9.52983	comp86499_c0	exon2	328	Thoc3	ENSMUSG00000025872
3	9.52983	comp77070_c0	exon3	72	Ninj1	ENSMUSG00000037966
3	9.52983	comp77070_c0	exon3	96	Ninj1	ENSMUSG00000037966
3	9.52983	comp52176_c0	exon19	172	Phf2	ENSMUSG00000038025
3	9.52983	comp52176_c0	exon19	196	Phf2	ENSMUSG00000038025
3	9.52983	comp85865_c0	exon49	244	C78339	ENSMUSG00000069237
3	10.0706	comp76660_c0	exon11	300	Sema4d	ENSMUSG00000021451
3	10.0706	comp15878_c0	exon17	93	Lman2	ENSMUSG00000021484
3	10.0706	comp67818_c0	exon4	174	B4galt7	ENSMUSG00000021504
3	10.0706	comp67818_c0	exon4	175	B4galt7	ENSMUSG00000021504
3	10.0706	comp79012_c0	exon1	1228	Secisbp2	ENSMUSG00000035139
3	10.0706	comp86178_c0	exon4	808	Nfil3	ENSMUSG00000056749
3	10.0706	comp86178_c0	exon4	809	Nfil3	ENSMUSG00000056749
3	16.2124	comp63643_c0	exon5	115	Gmpr	ENSMUSG00000000253
3	16.2124	comp58360_c0	exon1	2540	Kif13a	ENSMUSG00000021375
3	17.6089	comp63643_c0	exon5	88	Gmpr	ENSMUSG00000000253
3	17.6089	comp81733_c0	exon3	344	Cd83	ENSMUSG00000015396
3	17.6089	comp55408_c0	exon16	215	Ranbp9	ENSMUSG00000038546
3	17.6089	comp55408_c0	exon16	198	Ranbp9	ENSMUSG00000038546
3	23.0553	comp15708_c0	exon12	92	Tmem14c	ENSMUSG00000021361
3	23.0553	comp84221_c0	exon1	497	Elovl2	ENSMUSG00000021364
3	23.0553	comp83974_c0	exon2	1504	Nedd9	ENSMUSG00000021365
3	23.0553	comp71080_c0	exon19	910	Hivep1	ENSMUSG00000021366
3	23.0553	comp71080_c0	exon19	943	Hivep1	ENSMUSG00000021366
3	23.0553	comp71080_c0	exon19	946	Hivep1	ENSMUSG00000021366
3	23.0553	comp86476_c0	exon11	138	Edn1	ENSMUSG00000021367
3	23.0553	comp81043_c0	exon4	1642	Bmp6	ENSMUSG00000039004
3	23.0553	comp63389_c0	exon2	1040	Adtrp	ENSMUSG00000058022
3	23.0553	comp73337_c0	exon18	133	Tmem170b	ENSMUSG00000087370
3	23.0553	comp86913_c0	exon6	150	Smim13	ENSMUSG00000091264
3	24.6628	comp15240_c0	exon7	104	Eef1e1	ENSMUSG00000001707
3	24.6628	comp15240_c0	exon7	115	Eef1e1	ENSMUSG00000001707
3	24.6628	comp39274_c0	exon3	979	Slc35b3	ENSMUSG00000021432
3	24.6628	comp84733_c0	exon1	1845	F13a1	ENSMUSG00000039109
3	24.6628	comp15753_c0	exon9	1269	Dsp	ENSMUSG00000054889
3	30.1668	comp82148_c0	exon4	147	Hfe	ENSMUSG00000006611
3	30.1668	comp67109_c0	exon16	111	Pxdc1	ENSMUSG00000021411
3	30.1668	comp78441_c0	exon21	392	Prpf4b	ENSMUSG00000021413
3	30.1668	comp15067_c0	exon9	412	Fars2	ENSMUSG00000021420
3	30.1668	comp58285_c0	exon1	164	Lyrm4	ENSMUSG00000046573
3	32.3451	comp71780_c0	exon5	67	Acot13	ENSMUSG00000006717
3	32.3451	comp71780_c0	exon5	35	Acot13	ENSMUSG00000006717
3	32.3451	comp16430_c0	exon9	197	Prl8a6	ENSMUSG00000021345
3	32.3451	comp64307_c0	exon2	736	Gmds	ENSMUSG00000038372
3	32.3451	comp86113_c0	exon4	451	Uqcrfs1	ENSMUSG00000038462
3	32.3451	comp86113_c0	exon4	421	Uqcrfs1	ENSMUSG00000038462
3	32.3451	comp43821_c0	exon2	1490	Mboat1	ENSMUSG00000038732
3	32.3451	comp75505_c0	exon7	123	Arid4b	ENSMUSG00000039219
3	32.3451	comp50837_c0	exon23	229	Elmo1	ENSMUSG00000041112
3	32.3451	comp39472_c0	exon13	99	Serpinb1a	ENSMUSG00000044734
3	32.3451	comp15596_c0	exon7	542	Serpinb6a	ENSMUSG00000060147
3	33.9953	comp73878_c0	exon2	2558	E2f3	ENSMUSG00000016477
3	33.9953	comp52185_c0	exon9	568	Wrnip1	ENSMUSG00000021400
3	33.9953	comp80445_c0	exon3	200	Tdp2	ENSMUSG00000035958
3	33.9953	comp57367_c0	exon10	536	Agtr1a	ENSMUSG00000049115
3	33.9953	comp82822_c0	exon37	162	Heatr1	ENSMUSG00000050244
3	35.643	comp39782_c0	exon2	397	Gmnn	ENSMUSG00000006715
3	35.643	comp76848_c2	exon1	570	Zfp184	ENSMUSG00000006720
3	35.643	comp86587_c0	exon2	40	Rala	ENSMUSG00000008859
3	35.643	comp72056_c0	exon1	1561	Mplkip	ENSMUSG00000012429
3	35.643	comp85155_c0	exon3	387	Psma2	ENSMUSG00000015671
3	35.643	comp85155_c0	exon3	393	Psma2	ENSMUSG00000015671
3	35.643	comp86049_c0	exon1	100	Hist1h2bc	ENSMUSG00000018102
3	35.643	comp67921_c0	exon2	869	Ggps1	ENSMUSG00000021302
3	35.643	comp79921_c0	exon2	2738	Mrs2	ENSMUSG00000021339
3	35.643	comp70195_c0	exon1	1336	Larp4b	ENSMUSG00000033499
3	35.643	comp70195_c0	exon1	1342	Larp4b	ENSMUSG00000033499
3	35.643	comp70195_c0	exon1	1347	Larp4b	ENSMUSG00000033499
3	35.643	comp80445_c0	exon3	228	Tdp2	ENSMUSG00000035958
3	35.643	comp84719_c0	exon9	185	Prl3b1	ENSMUSG00000038891
3	35.643	comp84719_c0	exon9	174	Prl3b1	ENSMUSG00000038891
3	35.643	comp84719_c0	exon9	183	Prl3b1	ENSMUSG00000038891
3	35.643	comp85747_c0	exon32	124	Vps41	ENSMUSG00000041236
3	35.643	comp65821_c0	exon11	94	Cdk13	ENSMUSG00000041297
3	35.643	comp86437_c0	exon7	746	Inhba	ENSMUSG00000041324
3	35.643	comp73056_c0	exon19	140	Ero1lb	ENSMUSG00000057069
3	35.643	comp56508_c0	exon3	1487	Idi1	ENSMUSG00000058258
3	35.643	comp76127_c1	exon3	155	Hist1h4a	ENSMUSG00000060093
3	35.643	comp34364_c0	exon5	339	Yae1d1	ENSMUSG00000075054
3	48.9515	comp65887_c0	exon3	811	Prkcq	ENSMUSG00000026778
3	48.9515	comp65887_c0	exon3	812	Prkcq	ENSMUSG00000026778
3	48.9515	comp65887_c0	exon3	827	Prkcq	ENSMUSG00000026778
3	48.9515	comp54307_c0	exon5	288	Kin	ENSMUSG00000037262
3	48.9515	comp54307_c0	exon5	302	Kin	ENSMUSG00000037262
3	48.9515	comp84054_c1	exon1	1187	Ankrd16	ENSMUSG00000047909
3	49.4889	comp65489_c0	exon6	773	Sec61a2	ENSMUSG00000025816
3	49.4889	comp65489_c0	exon6	789	Sec61a2	ENSMUSG00000025816
3	49.4889	comp76319_c0	exon43	101	Coq9	ENSMUSG00000031782
3	49.4889	comp91939_c0	exon2	63	Asb13	ENSMUSG00000033781
3	49.4889	comp73435_c1	exon35	134	Elmod2	ENSMUSG00000035151
3	49.4889	comp73435_c1	exon35	107	Elmod2	ENSMUSG00000035151
3	49.4889	comp50867_c0	exon25	83	Upf2	ENSMUSG00000043241
3	49.4889	comp83317_c0	exon7	572	Rnaseh2a	ENSMUSG00000052926
3	49.4889	comp83317_c0	exon7	573	Rnaseh2a	ENSMUSG00000052926
3	50.0265	comp68134_c0	exon5	100	Mri1	ENSMUSG00000004996
3	50.0265	comp73433_c0	exon22	325	Ccdc3	ENSMUSG00000026676
3	50.0265	comp84431_c0	exon1	2060	Sf3b3	ENSMUSG00000033732
3	50.0265	comp16533_c0	exon3	129	Ndufb7	ENSMUSG00000033938
3	50.0265	comp80946_c2	exon22	215	Zswim4	ENSMUSG00000035671
3	50.5642	comp44199_c0	exon1	714	Calr	ENSMUSG00000003814
3	50.5642	comp69516_c0	exon15	43	Gcdh	ENSMUSG00000003809
3	50.5642	comp77665_c0	exon1	1048	Heatr3	ENSMUSG00000031657
3	50.5642	comp77665_c0	exon1	1066	Heatr3	ENSMUSG00000031657
3	50.5642	comp76858_c0	exon27	116	Rbl2	ENSMUSG00000031666
3	50.5642	comp55589_c0	exon2	3507	Tnpo2	ENSMUSG00000031691
3	50.5642	comp67347_c0	exon2	1532	Orc6	ENSMUSG00000031697
3	50.5642	comp67347_c0	exon2	1556	Orc6	ENSMUSG00000031697
3	50.5642	comp77647_c0	exon1	518	Mylk3	ENSMUSG00000031698
3	50.5642	comp15113_c0	exon4	170	Cc2d1a	ENSMUSG00000036686
3	50.5642	comp83850_c0	exon1	3779	Cyld	ENSMUSG00000036712
3	50.5642	comp78732_c0	exon1	2416	Papd5	ENSMUSG00000036779
3	50.5642	comp20395_c0	exon1	983	Siah1a	ENSMUSG00000036840
3	50.5642	comp72882_c0	exon9	658	Palm3	ENSMUSG00000047986
3	50.5642	comp72882_c0	exon9	675	Palm3	ENSMUSG00000047986
3	50.5642	comp70744_c0	exon1	667	Hook2	ENSMUSG00000052566
3	50.5642	comp79818_c0	exon3	679	Dhps	ENSMUSG00000060038
3	51.9956	comp81222_c1	exon1	1248	Mast1	ENSMUSG00000053693
3	56.2989	comp74162_c2	exon5	2088	Cdh1	ENSMUSG00000000303
3	56.2989	comp79232_c0	exon2	1393	Marveld3	ENSMUSG00000001672
3	56.2989	comp70854_c0	exon5	540	Ctcf	ENSMUSG00000005698
3	56.2989	comp65092_c0	exon1	972	Vac14	ENSMUSG00000010936
3	56.2989	comp74692_c0	exon29	129	Fhod1	ENSMUSG00000014778
3	56.2989	comp31575_c0	exon8	51	Tppp3	ENSMUSG00000014846
3	56.2989	comp79415_c2	exon6	1477	Ddx19a	ENSMUSG00000015023
3	56.2989	comp75155_c0	exon11	140	Slc12a4	ENSMUSG00000017765
3	56.2989	comp75061_c0	exon5	134	Gins3	ENSMUSG00000031669
3	56.2989	comp72902_c0	exon8	105	Setd6	ENSMUSG00000031671
3	56.2989	comp76617_c0	exon5	505	Cdh11	ENSMUSG00000031673
3	56.2989	comp83831_c0	exon7	87	Ist1	ENSMUSG00000031729
3	56.2989	comp54258_c0	exon11	51	Dhodh	ENSMUSG00000031730
3	56.2989	comp82551_c0	exon1	1299	Mmp2	ENSMUSG00000031740
3	56.2989	comp82551_c0	exon1	1281	Mmp2	ENSMUSG00000031740
3	56.2989	comp83806_c0	exon4	341	St3gal2	ENSMUSG00000031749
3	56.2989	comp68529_c0	exon12	163	Pllp	ENSMUSG00000031775
3	56.2989	comp68529_c0	exon12	156	Pllp	ENSMUSG00000031775
3	56.2989	comp83496_c0	exon3	526	Gpr56	ENSMUSG00000031785
3	56.2989	comp78907_c0	exon14	225	Mmp15	ENSMUSG00000031790
3	56.2989	comp77621_c0	exon15	296	Cdh5	ENSMUSG00000031871
3	56.2989	comp75323_c0	exon2	1065	Dus2	ENSMUSG00000031901
3	56.2989	comp67052_c0	exon1	2488	Nfatc3	ENSMUSG00000031902
3	56.2989	comp67052_c0	exon1	2515	Nfatc3	ENSMUSG00000031902
3	56.2989	comp73282_c1	exon2	2549	Pla2g15	ENSMUSG00000031903
3	56.2989	comp83411_c0	exon1	445	Zfp90	ENSMUSG00000031907
3	56.2989	comp82849_c2	exon11	176	Vps4a	ENSMUSG00000031913
3	56.2989	comp67900_c0	exon1	472	Cog8	ENSMUSG00000031916
3	56.2989	comp82620_c0	exon1	295	Gabarapl2	ENSMUSG00000031950
3	56.2989	comp77375_c1	exon5	68	Tmem170	ENSMUSG00000031953
3	56.2989	comp84050_c0	exon26	130	Aars	ENSMUSG00000031960
3	56.2989	comp63845_c0	exon2	1057	Terf2ip	ENSMUSG00000033430
3	56.2989	comp79774_c0	exon3	1565	Fuk	ENSMUSG00000033703
3	56.2989	comp77169_c0	exon14	117	Tk2	ENSMUSG00000035824
3	56.2989	comp68476_c0	exon19	115	Edc4	ENSMUSG00000036270
3	56.2989	comp71552_c0	exon1	1349	Edc4	ENSMUSG00000036270
3	56.2989	comp71552_c0	exon1	1385	Edc4	ENSMUSG00000036270
3	56.2989	comp48515_c0	exon1	889	Thap11	ENSMUSG00000036442
3	56.2989	comp77731_c0	exon3	2194	Slc38a7	ENSMUSG00000036534
3	56.2989	comp77731_c0	exon3	2223	Slc38a7	ENSMUSG00000036534
3	56.2989	comp77731_c0	exon3	2228	Slc38a7	ENSMUSG00000036534
3	56.2989	comp74992_c0	exon3	2654	Cnot1	ENSMUSG00000036550
3	56.2989	comp82222_c0	exon14	278	Fam65a	ENSMUSG00000038604
3	56.2989	comp82222_c0	exon14	247	Fam65a	ENSMUSG00000038604
3	56.2989	comp82222_c0	exon14	232	Fam65a	ENSMUSG00000038604
3	56.2989	comp51352_c0	exon7	104	Psmd7	ENSMUSG00000039067
3	56.2989	comp80555_c0	exon1	1338	Zdhhc1	ENSMUSG00000039199
3	56.2989	comp83945_c0	exon4	1784	Cmtr2	ENSMUSG00000046441
3	56.2989	comp82780_c0	exon1	1075	Zfp319	ENSMUSG00000046556
3	56.2989	comp70581_c0	exon4	1692	Chtf8	ENSMUSG00000046691
3	56.2989	comp70581_c0	exon4	1694	Chtf8	ENSMUSG00000046691
3	56.2989	comp70818_c0	exon13	191	Csnk2a2	ENSMUSG00000046707
3	56.2989	comp86265_c0	exon2	412	Pskh1	ENSMUSG00000048310
3	56.2989	comp73460_c0	exon2	107	Rspry1	ENSMUSG00000050079
3	56.2989	comp74805_c0	exon24	134	Slc6a2	ENSMUSG00000055368
3	56.2989	comp74805_c0	exon24	117	Slc6a2	ENSMUSG00000055368
3	56.2989	comp76148_c0	exon3	1196	Prmt7	ENSMUSG00000060098
3	56.2989	comp64235_c1	exon19	1481	Atxn1l	ENSMUSG00000069895
3	56.2989	comp84496_c0	exon3	1412	Esrp2	ENSMUSG00000084128
3	56.2989	comp82175_c0	exon34	114	Cmtm4	ENSMUSG00000096188
3	56.2989	comp82175_c0	exon34	118	Cmtm4	ENSMUSG00000096188
3	56.8175	comp57618_c0	exon6	138	Psmg4	ENSMUSG00000071451
3	57.3551	comp69088_c0	exon1	1233	Bbs2	ENSMUSG00000031755
3	57.8928	comp72536_c0	exon9	153	Tradd	ENSMUSG00000031887
3	57.8928	comp72536_c0	exon9	152	Tradd	ENSMUSG00000031887
3	60.6407	comp43422_c0	exon4	132	Kif5b	ENSMUSG00000006740
3	60.6407	comp40506_c0	exon55	244	Piezo1	ENSMUSG00000014444
3	60.6407	comp48043_c0	exon1	899	Hsdl1	ENSMUSG00000034189
3	60.6407	comp85680_c0	exon8	50	Coa6	ENSMUSG00000051671
3	60.6407	comp85852_c0	exon6	48	Aprt	ENSMUSG00000006589
3	60.6407	comp85852_c0	exon6	29	Aprt	ENSMUSG00000006589
3	60.6407	comp57093_c0	exon7	298	Rnf166	ENSMUSG00000014470
3	60.6407	comp57093_c0	exon7	289	Rnf166	ENSMUSG00000014470
3	60.6407	comp78172_c0	exon2	209	Map3k8	ENSMUSG00000024235
3	60.6407	comp79818_c1	exon2	155	Map1lc3b	ENSMUSG00000031812
3	60.6407	comp78899_c0	exon23	129	Mthfsd	ENSMUSG00000031816
3	60.6407	comp78899_c0	exon23	162	Mthfsd	ENSMUSG00000031816
3	60.6407	comp80174_c0	exon9	69	Gins2	ENSMUSG00000031821
3	60.6407	comp84032_c0	exon8	377	6430548M08Rik	ENSMUSG00000031824
3	60.6407	comp84032_c0	exon8	360	6430548M08Rik	ENSMUSG00000031824
3	60.6407	comp70936_c0	exon2	1490	Usp10	ENSMUSG00000031826
3	60.6407	comp83760_c2	exon9	61	Klhl36	ENSMUSG00000031828
3	60.6407	comp77792_c0	exon13	91	Mbtps1	ENSMUSG00000031835
3	60.6407	comp86014_c0	exon2	132	Hsd17b2	ENSMUSG00000031844
3	60.6407	comp83513_c0	exon8	85	Bco1	ENSMUSG00000031845
3	60.6407	comp15967_c0	exon1	1646	Abcb10	ENSMUSG00000031974
3	60.6407	comp84209_c2	exon2	3311	Urb2	ENSMUSG00000031976
3	60.6407	comp71055_c0	exon20	219	Cog2	ENSMUSG00000031979
3	60.6407	comp73401_c0	exon5	122	Arv1	ENSMUSG00000031982
3	60.6407	comp74867_c0	exon3	107	2810004N23Rik	ENSMUSG00000031984
3	60.6407	comp55883_c0	exon34	99	Egln1	ENSMUSG00000031987
3	60.6407	comp84200_c0	exon2	389	Fanca	ENSMUSG00000032815
3	60.6407	comp84200_c0	exon2	413	Fanca	ENSMUSG00000032815
3	60.6407	comp70232_c0	exon19	488	Spata2l	ENSMUSG00000033594
3	60.6407	comp87238_c0	exon2	577	Kcnk1	ENSMUSG00000033998
3	60.6407	comp87238_c0	exon2	574	Kcnk1	ENSMUSG00000033998
3	60.6407	comp73112_c0	exon14	123	Atp2c2	ENSMUSG00000034112
3	60.6407	comp85662_c0	exon34	314	Slc7a5	ENSMUSG00000040010
3	60.6407	comp71695_c1	exon3	823	Klhdc4	ENSMUSG00000040263
3	60.6407	comp85336_c0	exon3	870	Fam89a	ENSMUSG00000043068
3	60.6407	comp85336_c0	exon3	910	Fam89a	ENSMUSG00000043068
3	60.6407	comp85336_c0	exon3	897	Fam89a	ENSMUSG00000043068
3	60.6407	comp85336_c0	exon3	911	Fam89a	ENSMUSG00000043068
3	60.6407	comp85680_c0	exon8	75	Coa6	ENSMUSG00000051671
3	60.6407	comp80193_c0	exon7	487	Tsnax	ENSMUSG00000056820
3	60.6407	comp77705_c0	exon6	294	Mlycd	ENSMUSG00000074064
3	60.6407	comp76970_c0	exon3	2749	Gm17296	ENSMUSG00000090290
3	61.1784	comp56940_c0	exon2	1306	Spire2	ENSMUSG00000010154
3	61.5521	comp61044_c0	exon11	361	Zfp821	ENSMUSG00000031728
3	61.5521	comp82981_c0	exon2	933	Fam171a1	ENSMUSG00000050530
3	63.0199	comp86414_c0	exon6	283	Bambi	ENSMUSG00000024232
3	63.0199	comp68469_c1	exon5	663	Zeb1	ENSMUSG00000024238
3	63.0199	comp73223_c0	exon4	120	Epc1	ENSMUSG00000024240
3	63.0199	comp69194_c1	exon1	2063	Wac	ENSMUSG00000024283
3	63.0199	comp70541_c0	exon2	427	Pip4k2a	ENSMUSG00000026737
3	63.0199	comp19717_c0	exon27	369	Bmi1	ENSMUSG00000026739
3	63.0199	comp73453_c0	exon23	196	Mllt10	ENSMUSG00000026743
3	63.0199	comp82164_c1	exon60	1367	Plxdc2	ENSMUSG00000026748
3	63.0199	comp82164_c1	exon60	1371	Plxdc2	ENSMUSG00000026748
3	63.0199	comp71521_c0	exon4	838	Acbd5	ENSMUSG00000026781
3	63.0199	comp50391_c0	exon23	219	Tldc1	ENSMUSG00000034105
3	63.0199	comp19371_c0	exon3	314	Dusp10	ENSMUSG00000039384
3	66.3134	comp63521_c0	exon37	322	Ahctf1	ENSMUSG00000026491
3	66.3134	comp83933_c1	exon1	1262	Dcaf8	ENSMUSG00000026554
3	66.3134	comp66881_c0	exon1	2008	Nmt2	ENSMUSG00000026643
3	66.3134	comp79768_c0	exon2	3118	Cubn	ENSMUSG00000026726
3	66.3134	comp79768_c0	exon2	3140	Cubn	ENSMUSG00000026726
3	66.3134	comp79768_c0	exon2	3143	Cubn	ENSMUSG00000026726
3	66.3134	comp15838_c0	exon4	468	Vim	ENSMUSG00000026728
3	66.3134	comp72941_c0	exon27	87	Fam188a	ENSMUSG00000026767
3	66.3134	comp84325_c0	exon1	3282	Itga8	ENSMUSG00000026768
3	66.3134	comp68580_c0	exon2	428	Rpp38	ENSMUSG00000049950
3	66.3134	comp50132_c0	exon15	159	Rps6kc1	ENSMUSG00000089872
3	66.8398	comp77651_c0	exon9	124	Rrp15	ENSMUSG00000001305
3	66.8398	comp16370_c0	exon1	1013	Mcm5	ENSMUSG00000005410
3	66.8398	comp70525_c0	exon7	142	Psen2	ENSMUSG00000010609
3	66.8398	comp70525_c0	exon7	155	Psen2	ENSMUSG00000010609
3	66.8398	comp85052_c0	exon2	1383	Cr1l	ENSMUSG00000016481
3	66.8398	comp49900_c0	exon28	83	Parp1	ENSMUSG00000026496
3	66.8398	comp65330_c0	exon6	132	Cox20	ENSMUSG00000026500
3	66.8398	comp40928_c0	exon1	1454	Capn2	ENSMUSG00000026509
3	66.8398	comp56049_c0	exon5	96	Fh1	ENSMUSG00000026526
3	66.8398	comp69445_c0	exon7	566	Dusp23	ENSMUSG00000026544
3	66.8398	comp48870_c0	exon7	115	Tagln2	ENSMUSG00000026547
3	66.8398	comp78105_c0	exon4	98	Mpzl1	ENSMUSG00000026566
3	66.8398	comp61989_c0	exon16	169	Dcaf6	ENSMUSG00000026571
3	66.8398	comp86505_c0	exon4	1040	Bpnt1	ENSMUSG00000026617
3	66.8398	comp86505_c0	exon4	1025	Bpnt1	ENSMUSG00000026617
3	66.8398	comp86505_c0	exon4	1047	Bpnt1	ENSMUSG00000026617
3	66.8398	comp55757_c0	exon19	153	Mark1	ENSMUSG00000026620
3	66.8398	comp55757_c0	exon19	156	Mark1	ENSMUSG00000026620
3	66.8398	comp75015_c0	exon57	310	Lpgat1	ENSMUSG00000026623
3	66.8398	comp75015_c0	exon57	309	Lpgat1	ENSMUSG00000026623
3	66.8398	comp65265_c0	exon8	330	Ppp2r5a	ENSMUSG00000026626
3	66.8398	comp76968_c0	exon17	28	Tmem206	ENSMUSG00000026627
3	66.8398	comp65526_c0	exon7	117	Atf3	ENSMUSG00000026628
3	66.8398	comp81760_c2	exon4	1476	Irf6	ENSMUSG00000026638
3	66.8398	comp81760_c2	exon4	1477	Irf6	ENSMUSG00000026638
3	66.8398	comp81760_c2	exon4	1513	Irf6	ENSMUSG00000026638
3	66.8398	comp81699_c0	exon35	88	Frmd4a	ENSMUSG00000026657
3	66.8398	comp75728_c0	exon10	207	Dusp12	ENSMUSG00000026659
3	66.8398	comp55503_c0	exon22	131	Sephs1	ENSMUSG00000026662
3	66.8398	comp75884_c0	exon3	2303	Atf6	ENSMUSG00000026663
3	66.8398	comp82291_c1	exon19	144	Uap1	ENSMUSG00000026670
3	66.8398	comp83506_c0	exon1	417	Hsd17b7	ENSMUSG00000026675
3	66.8398	comp69147_c0	exon6	146	Rgs5	ENSMUSG00000026678
3	66.8398	comp69147_c0	exon6	107	Rgs5	ENSMUSG00000026678
3	66.8398	comp69147_c0	exon6	106	Rgs5	ENSMUSG00000026678
3	66.8398	comp60525_c0	exon1	525	Serpinc1	ENSMUSG00000026715
3	66.8398	comp84443_c0	exon4	123	Rabgap1l	ENSMUSG00000026721
3	66.8398	comp84443_c0	exon4	87	Rabgap1l	ENSMUSG00000026721
3	66.8398	comp15873_c1	exon3	1187	Ednra	ENSMUSG00000031616
3	66.8398	comp15873_c1	exon3	1190	Ednra	ENSMUSG00000031616
3	66.8398	comp55894_c0	exon2	1195	Tmem184c	ENSMUSG00000031617
3	66.8398	comp48342_c0	exon23	1002	Gab1	ENSMUSG00000031714
3	66.8398	comp79342_c1	exon38	660	Cep350	ENSMUSG00000033671
3	66.8398	comp73476_c0	exon1	934	Mmaa	ENSMUSG00000037022
3	66.8398	comp81421_c1	exon28	933	Rbmxl1	ENSMUSG00000037070
3	66.8398	comp81421_c1	exon28	909	Rbmxl1	ENSMUSG00000037070
3	66.8398	comp81421_c1	exon28	944	Rbmxl1	ENSMUSG00000037070
3	66.8398	comp84024_c0	exon2	2087	Prmt10	ENSMUSG00000037134
3	66.8398	comp83609_c0	exon2	207	Vash2	ENSMUSG00000037568
3	66.8398	comp74192_c1	exon10	107	Igsf9	ENSMUSG00000037995
3	66.8398	comp77074_c0	exon19	53	F11r	ENSMUSG00000038235
3	66.8398	comp77074_c0	exon19	49	F11r	ENSMUSG00000038235
3	66.8398	comp67943_c0	exon23	94	Susd4	ENSMUSG00000038576
3	66.8398	comp67943_c0	exon23	101	Susd4	ENSMUSG00000038576
3	66.8398	comp56753_c0	exon34	124	Wdr26	ENSMUSG00000038733
3	66.8398	comp71405_c1	exon1	812	Sde2	ENSMUSG00000038806
3	66.8398	comp71405_c1	exon1	779	Sde2	ENSMUSG00000038806
3	66.8398	comp56712_c1	exon1	868	Cnst	ENSMUSG00000038949
3	66.8398	comp56712_c1	exon1	869	Cnst	ENSMUSG00000038949
3	66.8398	comp50507_c0	exon24	96	Rab3gap2	ENSMUSG00000039318
3	66.8398	comp76362_c1	exon1	119	Aida	ENSMUSG00000042901
3	66.8398	comp15773_c0	exon33	141	Brox	ENSMUSG00000046836
3	66.8398	comp69423_c0	exon2	859	Fbxo28	ENSMUSG00000047539
3	66.8398	comp51413_c0	exon33	193	Grem2	ENSMUSG00000050069
3	66.8398	comp80534_c0	exon8	291	B4galt3	ENSMUSG00000052423
3	66.8398	comp83423_c0	exon6	3583	Cep170	ENSMUSG00000057335
3	66.8398	comp80775_c0	exon2	202	Fam78b	ENSMUSG00000060568
3	66.8398	comp80775_c0	exon2	227	Fam78b	ENSMUSG00000060568
3	66.8398	comp85495_c0	exon4	329	Cnih4	ENSMUSG00000062169
3	66.8398	comp72507_c1	exon2	169	Ufc1	ENSMUSG00000062963
3	66.8398	comp72507_c1	exon2	205	Ufc1	ENSMUSG00000062963
3	66.8398	comp84333_c1	exon3	3766	Chml	ENSMUSG00000078185
3	66.8398	comp71058_c0	exon17	116	Sdccag8	ENSMUSG00000026504
3	66.8398	comp85968_c0	exon15	184	Fam63a	ENSMUSG00000038712
3	66.8398	comp85450_c0	exon4	923	Creg1	ENSMUSG00000040713
3	66.8398	comp85450_c0	exon4	883	Creg1	ENSMUSG00000040713
3	66.8398	comp68747_c0	exon11	304	Nsl1	ENSMUSG00000062510
3	66.8398	comp78207_c0	exon1	2157	Taf1a	ENSMUSG00000072258
3	66.8398	comp78065_c0	exon5	117	Optn	ENSMUSG00000026672
3	66.8398	comp78065_c0	exon5	111	Optn	ENSMUSG00000026672
3	66.8398	comp75381_c0	exon1	1847	Nos1ap	ENSMUSG00000038473
3	66.8398	comp75966_c0	exon1	373	Enah	ENSMUSG00000022995
3	67.3774	comp16371_c0	exon1	951	Tmem63a	ENSMUSG00000026519
3	67.3774	comp15870_c0	exon24	276	Eprs	ENSMUSG00000026615
3	67.915	comp73332_c0	exon1	368	Cacybp	ENSMUSG00000014226
3	68.4527	comp75077_c0	exon1	715	Xpr1	ENSMUSG00000026469
3	68.4527	comp78996_c0	exon4	155	Stx6	ENSMUSG00000026470
3	68.4527	comp79587_c0	exon29	103	Lamc2	ENSMUSG00000026479
3	68.4527	comp85272_c0	exon3	641	Atp1b1	ENSMUSG00000026576
3	68.4527	comp15806_c0	exon5	2161	Kifap3	ENSMUSG00000026585
3	68.4527	comp83607_c11	exon1	1006	Prdx6	ENSMUSG00000026701
3	68.4527	comp75992_c0	exon19	274	Gorab	ENSMUSG00000040124
3	68.4527	comp71192_c0	exon46	346	Suco	ENSMUSG00000040297
3	68.4527	comp63458_c0	exon2	1120	2810025M15Rik	ENSMUSG00000049881
3	68.4527	comp63458_c0	exon2	1147	2810025M15Rik	ENSMUSG00000049881
3	68.4527	comp82193_c0	exon6	517	Pigm	ENSMUSG00000050229
3	68.4527	comp68162_c0	exon4	372	Tor1aip2	ENSMUSG00000050565
3	68.4527	comp85847_c0	exon1	574	Mrps14	ENSMUSG00000058267
3	68.4527	comp68111_c0	exon35	550	Pappa2	ENSMUSG00000073530
3	70.1012	comp58838_c0	exon3	43	Trp53	ENSMUSG00000059552
3	71.7545	comp84522_c0	exon32	136	Hltf	ENSMUSG00000002428
3	71.7545	comp70765_c0	exon16	242	BC003331	ENSMUSG00000006010
3	71.7545	comp70765_c0	exon16	208	BC003331	ENSMUSG00000006010
3	71.7545	comp85085_c0	exon1	720	Arpc5	ENSMUSG00000008475
3	71.7545	comp71905_c0	exon2	777	Ivns1abp	ENSMUSG00000023150
3	71.7545	comp71905_c0	exon2	795	Ivns1abp	ENSMUSG00000023150
3	71.7545	comp83777_c0	exon1	2753	Hps3	ENSMUSG00000027615
3	71.7545	comp70833_c0	exon32	323	Nceh1	ENSMUSG00000027698
3	71.7545	comp76923_c0	exon6	1888	Ptgs2	ENSMUSG00000032487
3	71.7545	comp76923_c0	exon6	1911	Ptgs2	ENSMUSG00000032487
3	71.7545	comp76923_c0	exon6	1930	Ptgs2	ENSMUSG00000032487
3	71.7545	comp71005_c0	exon6	177	1700025G04Rik	ENSMUSG00000032666
3	71.7545	comp77974_c3	exon23	131	Prkci	ENSMUSG00000037643
3	71.7545	comp85885_c0	exon2	673	Npl	ENSMUSG00000042684
3	71.7545	comp55954_c0	exon1	2275	Edem3	ENSMUSG00000043019
3	71.7545	comp63468_c0	exon2	2091	Swt1	ENSMUSG00000052748
3	71.7545	comp71365_c1	exon13	126	Trmt1l	ENSMUSG00000053286
3	73.3881	comp76015_c0	exon23	404	Ccrn4l	ENSMUSG00000023087
3	73.3881	comp63089_c0	exon44	52	Mfsd8	ENSMUSG00000025759
3	73.3881	comp76093_c5	exon1	1197	Jade1	ENSMUSG00000025764
3	73.3881	comp68401_c0	exon3	261	D3Ertd751e	ENSMUSG00000025766
3	73.3881	comp86708_c0	exon1	951	Zfp639	ENSMUSG00000027667
3	73.3881	comp86000_c0	exon3	988	Gnb4	ENSMUSG00000027669
3	73.3881	comp81375_c0	exon3	250	Actl6a	ENSMUSG00000027671
3	73.3881	comp74873_c0	exon7	96	Pld1	ENSMUSG00000027695
3	73.3881	comp47837_c0	exon2	1131	Acad9	ENSMUSG00000027710
3	73.3881	comp67746_c0	exon2	1975	Spata5	ENSMUSG00000027722
3	73.3881	comp83359_c0	exon6	104	Rab33b	ENSMUSG00000027739
3	73.3881	comp83359_c0	exon6	91	Rab33b	ENSMUSG00000027739
3	73.3881	comp55664_c0	exon4	1458	Cog6	ENSMUSG00000027742
3	73.3881	comp65218_c0	exon6	114	Ufm1	ENSMUSG00000027746
3	73.3881	comp70937_c0	exon12	282	Mbnl1	ENSMUSG00000027763
3	73.3881	comp70470_c1	exon5	98	Gfm1	ENSMUSG00000027774
3	73.3881	comp16263_c0	exon22	93	Mfsd1	ENSMUSG00000027775
3	73.3881	comp67881_c0	exon1	252	Pfn2	ENSMUSG00000027805
3	73.3881	comp67881_c0	exon1	241	Pfn2	ENSMUSG00000027805
3	73.3881	comp81685_c1	exon20	441	Slc33a1	ENSMUSG00000027822
3	73.3881	comp76639_c1	exon15	65	Ccnl1	ENSMUSG00000027829
3	73.3881	comp64770_c0	exon16	214	Rsrc1	ENSMUSG00000034544
3	73.3881	comp19768_c0	exon8	215	Tiparp	ENSMUSG00000034640
3	73.3881	comp85858_c0	exon3	604	Commd2	ENSMUSG00000036513
3	73.3881	comp16374_c0	exon4	630	Rfxap	ENSMUSG00000036615
3	73.3881	comp66784_c0	exon1	371	Alg5	ENSMUSG00000036632
3	73.3881	comp56155_c0	exon16	668	Spry1	ENSMUSG00000037211
3	73.3881	comp82307_c0	exon2	5760	4932438A13Rik	ENSMUSG00000037270
3	73.3881	comp51361_c0	exon3	2684	Atp11b	ENSMUSG00000037400
3	73.3881	comp65906_c0	exon4	713	Gpr160	ENSMUSG00000037661
3	73.3881	comp83542_c0	exon2	172	Mynn	ENSMUSG00000037730
3	73.3881	comp50621_c0	exon3	178	Rpl22l1	ENSMUSG00000039221
3	73.3881	comp82516_c14	exon8	137	Nhlrc3	ENSMUSG00000042997
3	73.3881	comp82516_c14	exon8	95	Nhlrc3	ENSMUSG00000042997
3	73.3881	comp15459_c0	exon4	418	Mlf1	ENSMUSG00000048416
3	73.3881	comp80028_c0	exon3	108	E130311K13Rik	ENSMUSG00000048581
3	73.3881	comp72638_c0	exon8	194	Rarres1	ENSMUSG00000049404
3	73.3881	comp86404_c0	exon2	274	Pgrmc2	ENSMUSG00000049940
3	81.356	comp80116_c0	exon1	416	Chtop	ENSMUSG00000001017
3	81.356	comp72175_c1	exon12	420	P2ry1	ENSMUSG00000027765
3	81.356	comp82902_c0	exon5	97	Schip1	ENSMUSG00000027777
3	81.356	comp85613_c0	exon2	1475	Kpna4	ENSMUSG00000027782
3	81.356	comp64542_c0	exon35	247	Nmd3	ENSMUSG00000027787
3	81.356	comp67615_c0	exon1	493	Lmna	ENSMUSG00000028063
3	81.356	comp79795_c0	exon2	431	Trim59	ENSMUSG00000034317
3	81.356	comp67432_c0	exon5	577	B3galnt1	ENSMUSG00000043300
3	84.6542	comp79349_c0	exon1	63	Snapin	ENSMUSG00000001018
3	84.6542	comp79349_c0	exon1	48	Snapin	ENSMUSG00000001018
3	84.6542	comp73217_c0	exon8	94	Glmp	ENSMUSG00000001418
3	84.6542	comp73217_c0	exon8	112	Glmp	ENSMUSG00000001418
3	84.6542	comp86287_c0	exon2	58	Psmb4	ENSMUSG00000005779
3	84.6542	comp86287_c0	exon2	41	Psmb4	ENSMUSG00000005779
3	84.6542	comp86100_c0	exon13	130	Ubqln4	ENSMUSG00000008604
3	84.6542	comp86100_c0	exon13	151	Ubqln4	ENSMUSG00000008604
3	84.6542	comp86133_c0	exon8	147	Vps72	ENSMUSG00000008958
3	84.6542	comp86133_c0	exon8	121	Vps72	ENSMUSG00000008958
3	84.6542	comp76438_c0	exon1	310	Ssr3	ENSMUSG00000027828
3	84.6542	comp84919_c0	exon1	174	S100a11	ENSMUSG00000027907
3	84.6542	comp84919_c0	exon1	192	S100a11	ENSMUSG00000027907
3	84.6542	comp76837_c0	exon2	2602	Ints3	ENSMUSG00000027933
3	84.6542	comp76474_c0	exon2	116	Il6ra	ENSMUSG00000027947
3	84.6542	comp79695_c0	exon3	175	Pmvk	ENSMUSG00000027952
3	84.6542	comp85204_c0	exon11	120	Efna1	ENSMUSG00000027954
3	84.6542	comp85204_c0	exon11	156	Efna1	ENSMUSG00000027954
3	84.6542	comp56931_c0	exon21	95	Tmem144	ENSMUSG00000027956
3	84.6542	comp56931_c0	exon21	111	Tmem144	ENSMUSG00000027956
3	84.6542	comp86070_c0	exon15	87	Plrg1	ENSMUSG00000027998
3	84.6542	comp86070_c0	exon15	110	Plrg1	ENSMUSG00000027998
3	84.6542	comp87025_c0	exon2	208	Gucy1b3	ENSMUSG00000028005
3	84.6542	comp86185_c0	exon11	177	Efna4	ENSMUSG00000028040
3	84.6542	comp86185_c0	exon11	176	Efna4	ENSMUSG00000028040
3	84.6542	comp83769_c0	exon7	104	Gba	ENSMUSG00000028048
3	84.6542	comp69774_c0	exon20	90	2810403A07Rik	ENSMUSG00000028060
3	84.6542	comp81273_c0	exon29	94	Pear1	ENSMUSG00000028073
3	84.6542	comp81273_c0	exon29	118	Pear1	ENSMUSG00000028073
3	84.6542	comp77633_c0	exon8	2189	Lrba	ENSMUSG00000028080
3	84.6542	comp80761_c1	exon2	2410	Sh3d19	ENSMUSG00000028082
3	84.6542	comp63910_c0	exon17	21	Gatb	ENSMUSG00000028085
3	84.6542	comp64546_c0	exon9	163	Fbxw7	ENSMUSG00000028086
3	84.6542	comp77948_c0	exon3	459	Them4	ENSMUSG00000028145
3	84.6542	comp47976_c0	exon12	130	Fgg	ENSMUSG00000033860
3	84.6542	comp84330_c0	exon35	147	Map9	ENSMUSG00000033900
3	84.6542	comp87043_c0	exon33	508	Gucy1a3	ENSMUSG00000033910
3	84.6542	comp87043_c0	exon33	489	Gucy1a3	ENSMUSG00000033910
3	84.6542	comp77693_c0	exon79	684	Otud7b	ENSMUSG00000038495
3	84.6542	comp44218_c0	exon6	94	Car14	ENSMUSG00000038526
3	84.6542	comp44218_c0	exon6	76	Car14	ENSMUSG00000038526
3	84.6542	comp70488_c0	exon2	225	Ensa	ENSMUSG00000038619
3	84.6542	comp84391_c0	exon3	3513	Kirrel	ENSMUSG00000041734
3	84.6542	comp81180_c0	exon2	115	Gatad2b	ENSMUSG00000042390
3	84.6542	comp66423_c0	exon2	1627	Ube2q1	ENSMUSG00000042572
3	84.6542	comp84356_c2	exon7	386	Flad1	ENSMUSG00000042642
3	84.6542	comp85143_c0	exon14	204	Krtcap2	ENSMUSG00000042747
3	84.6542	comp81599_c0	exon6	153	Slc25a44	ENSMUSG00000050144
3	84.6542	comp81599_c0	exon6	171	Slc25a44	ENSMUSG00000050144
3	84.6542	comp90402_c0	exon2	51	Mllt11	ENSMUSG00000053192
3	84.6542	comp56222_c0	exon25	169	Lysmd1	ENSMUSG00000053769
3	84.6542	comp84269_c4	exon1	3824	Gon4l	ENSMUSG00000054199
3	84.6542	comp78046_c2	exon34	137	Rapgef2	ENSMUSG00000062232
3	84.6542	comp80061_c0	exon1	550	Dap3	ENSMUSG00000068921
3	84.6542	comp56487_c0	exon27	138	Arfip1	ENSMUSG00000074513
3	84.6542	comp78487_c0	exon2	862	Etv3	ENSMUSG00000003382
3	84.6542	comp56127_c1	exon28	143	Arhgef2	ENSMUSG00000028059
3	84.6542	comp84229_c0	exon5	317	Fhdc1	ENSMUSG00000041842
3	84.6542	comp85317_c0	exon7	103	S100a10	ENSMUSG00000041959
3	85.7381	comp56239_c0	exon1	959	Prune	ENSMUSG00000015711
3	85.7381	comp80210_c0	exon56	170	Gpr89	ENSMUSG00000028096
3	85.7381	comp80210_c0	exon56	140	Gpr89	ENSMUSG00000028096
3	85.7381	comp79126_c0	exon3	256	Polr3c	ENSMUSG00000028099
3	85.7381	comp80759_c0	exon1	393	Polr3gl	ENSMUSG00000028104
3	85.7381	comp54272_c0	exon18	422	Txnip	ENSMUSG00000038393
3	85.7381	comp80728_c0	exon3	252	Hfe2	ENSMUSG00000038403
3	85.7381	comp71954_c1	exon7	662	Gja5	ENSMUSG00000057123
3	86.8171	comp79325_c2	exon1	1016	Fmo5	ENSMUSG00000028088
3	86.8171	comp76634_c0	exon1	2591	Chd1l	ENSMUSG00000028089
3	86.8171	comp84920_c0	exon9	161	Slc16a1	ENSMUSG00000032902
3	86.8171	comp84920_c0	exon9	167	Slc16a1	ENSMUSG00000032902
3	86.8171	comp83328_c2	exon48	268	Prkab2	ENSMUSG00000038205
3	87.5301	comp65019_c0	exon8	604	Trim45	ENSMUSG00000033233
3	88.9554	comp18863_c0	exon1	1132	Wars2	ENSMUSG00000004233
3	88.9554	comp72531_c0	exon20	604	Dclre1b	ENSMUSG00000027845
3	88.9554	comp74496_c0	exon1	1817	Vangl1	ENSMUSG00000027860
3	88.9554	comp71386_c0	exon29	151	Ptgfrn	ENSMUSG00000027864
3	88.9554	comp77368_c0	exon54	165	Lrig2	ENSMUSG00000032913
3	88.9554	comp81371_c0	exon28	113	Slc22a15	ENSMUSG00000033147
3	88.9554	comp81371_c0	exon28	54	Slc22a15	ENSMUSG00000033147
3	88.9554	comp81371_c0	exon28	109	Slc22a15	ENSMUSG00000033147
3	88.9554	comp84174_c0	exon2	3166	Ttf2	ENSMUSG00000033222
3	88.9554	comp84174_c0	exon2	3192	Ttf2	ENSMUSG00000033222
3	88.9554	comp77791_c0	exon4	114	Wdr3	ENSMUSG00000033285
3	88.9554	comp82903_c1	exon11	292	Mab21l3	ENSMUSG00000044313
3	88.9554	comp82903_c1	exon11	296	Mab21l3	ENSMUSG00000044313
3	88.9554	comp49959_c0	exon16	337	Cttnbp2nl	ENSMUSG00000062127
3	88.9554	comp83289_c0	exon6	82	Hsd3b2	ENSMUSG00000063730
3	95.8803	comp54254_c0	exon15	221	Wdr77	ENSMUSG00000000561
3	95.8803	comp85795_c0	exon2	423	Rhoc	ENSMUSG00000002233
3	95.8803	comp82644_c0	exon1	118	Strip1	ENSMUSG00000014601
3	95.8803	comp15173_c0	exon10	404	Olfml3	ENSMUSG00000027848
3	95.8803	comp15173_c0	exon10	459	Olfml3	ENSMUSG00000027848
3	95.8803	comp80255_c0	exon2	715	Prpf38b	ENSMUSG00000027881
3	95.8803	comp80255_c0	exon2	718	Prpf38b	ENSMUSG00000027881
3	95.8803	comp71418_c0	exon6	428	Slc16a4	ENSMUSG00000027896
3	95.8803	comp83129_c1	exon1	852	Rnpc3	ENSMUSG00000027981
3	95.8803	comp73442_c0	exon8	100	Frrs1	ENSMUSG00000033386
3	95.8803	comp84495_c0	exon7	164	Fam102b	ENSMUSG00000040339
3	95.8803	comp70720_c0	exon12	773	S1pr1	ENSMUSG00000045092
3	95.8803	comp49294_c0	exon1	67	St7l	ENSMUSG00000045576
3	95.8803	comp49294_c0	exon1	72	St7l	ENSMUSG00000045576
3	95.8803	comp80848_c0	exon40	460	Cyb561d1	ENSMUSG00000048796
3	95.8803	comp75666_c2	exon7	620	Lrif1	ENSMUSG00000056260
3	95.8803	comp76957_c0	exon6	250	Sars	ENSMUSG00000068739
3	95.8803	comp85371_c0	exon2	220	Psma5	ENSMUSG00000068749
3	95.8803	comp46736_c0	exon2	895	Lamtor5	ENSMUSG00000087260
3	98.589	comp67933_c0	exon12	87	Dbt	ENSMUSG00000000340
3	98.589	comp67933_c0	exon12	75	Dbt	ENSMUSG00000000340
3	98.589	comp67933_c0	exon12	69	Dbt	ENSMUSG00000000340
3	98.589	comp77258_c0	exon4	221	Extl2	ENSMUSG00000027963
3	98.589	comp73665_c0	exon11	61	Snx7	ENSMUSG00000028007
3	98.589	comp73442_c0	exon8	122	Frrs1	ENSMUSG00000033386
3	104.938	comp46169_c0	exon13	119	Mettl14	ENSMUSG00000028114
3	104.938	comp85153_c0	exon11	540	Gclm	ENSMUSG00000028124
3	104.938	comp52206_c0	exon1	1423	Sec24d	ENSMUSG00000039234
3	104.938	comp72420_c0	exon43	289	Usp53	ENSMUSG00000039701
3	104.938	comp63496_c0	exon16	314	Arhgap29	ENSMUSG00000039831
3	104.938	comp63496_c0	exon16	317	Arhgap29	ENSMUSG00000039831
3	104.938	comp84793_c0	exon1	665	Cnn3	ENSMUSG00000053931
3	104.938	comp84793_c0	exon1	629	Cnn3	ENSMUSG00000053931
3	111.247	comp83622_c0	exon1	1139	Enpep	ENSMUSG00000028024
3	111.247	comp83622_c0	exon1	1114	Enpep	ENSMUSG00000028024
3	111.247	comp52206_c0	exon1	1359	Sec24d	ENSMUSG00000039234
3	111.247	comp84289_c0	exon2	100	Elovl6	ENSMUSG00000041220
3	114.115	comp79017_c1	exon6	75	Cyp2u1	ENSMUSG00000027983
3	114.115	comp68258_c0	exon3	894	Hadh	ENSMUSG00000027984
3	114.115	comp86513_c0	exon9	162	Casp6	ENSMUSG00000027997
3	114.115	comp55707_c0	exon1	540	Ints12	ENSMUSG00000028016
3	114.115	comp80744_c1	exon2	716	Gtf2b	ENSMUSG00000028271
3	114.115	comp73883_c5	exon6	214	Sgms2	ENSMUSG00000050931
3	114.115	comp69592_c0	exon20	128	Dnajb14	ENSMUSG00000074212
3	114.115	comp82892_c1	exon4	468	Lamtor3	ENSMUSG00000091512
3	114.115	comp82892_c1	exon4	465	Lamtor3	ENSMUSG00000091512
3	115.301	comp81373_c0	exon1	1576	Dkk2	ENSMUSG00000028031
3	116.931	comp70844_c1	exon1	2119	Pkn2	ENSMUSG00000004591
3	116.931	comp70906_c0	exon9	855	Papss1	ENSMUSG00000028032
3	116.931	comp85343_c0	exon8	659	Adh5	ENSMUSG00000028138
3	116.931	comp55442_c0	exon33	122	Mttp	ENSMUSG00000028158
3	116.931	comp55442_c0	exon33	121	Mttp	ENSMUSG00000028158
3	116.931	comp55696_c0	exon14	342	Ppp3ca	ENSMUSG00000028161
3	116.931	comp55696_c0	exon14	334	Ppp3ca	ENSMUSG00000028161
3	116.931	comp55696_c0	exon14	345	Ppp3ca	ENSMUSG00000028161
3	116.931	comp83474_c3	exon18	267	Manba	ENSMUSG00000028164
3	116.931	comp76215_c0	exon2	146	Cisd2	ENSMUSG00000028165
3	116.931	comp76215_c0	exon2	158	Cisd2	ENSMUSG00000028165
3	116.931	comp82596_c0	exon7	108	Pdlim5	ENSMUSG00000028273
3	116.931	comp78617_c1	exon16	390	Slc9b2	ENSMUSG00000037994
3	116.931	comp80397_c1	exon29	268	Emcn	ENSMUSG00000054690
3	136.366	comp85193_c0	exon12	155	Wls	ENSMUSG00000028173
3	136.366	comp62287_c0	exon19	125	Cth	ENSMUSG00000028179
3	136.366	comp79706_c0	exon6	51	Zranb2	ENSMUSG00000028180
3	136.366	comp17845_c0	exon11	613	Ctbs	ENSMUSG00000028189
3	136.366	comp75919_c0	exon1	735	Cryz	ENSMUSG00000028199
3	136.366	comp51227_c0	exon1	1690	Gbp3	ENSMUSG00000028268
3	136.366	comp78695_c0	exon49	193	Ssx2ip	ENSMUSG00000036825
3	136.366	comp78671_c0	exon9	722	Syde2	ENSMUSG00000036863
3	136.366	comp72542_c0	exon13	134	Gipc2	ENSMUSG00000039131
3	136.366	comp77995_c0	exon1	993	Eltd1	ENSMUSG00000039167
3	136.366	comp77995_c0	exon1	1020	Eltd1	ENSMUSG00000039167
3	136.366	comp81578_c0	exon1	157	Ankrd13c	ENSMUSG00000039988
3	136.366	comp67731_c0	exon15	470	St6galnac3	ENSMUSG00000052544
3	136.366	comp67731_c0	exon15	464	St6galnac3	ENSMUSG00000052544
3	136.366	comp77037_c0	exon11	89	Acadm	ENSMUSG00000062908
3	136.366	comp63240_c0	exon7	94	Lrrc40	ENSMUSG00000063052
4	0	comp82163_c0	exon7	134	Armc1	ENSMUSG00000027599
4	0	comp56254_c0	exon3	53	Tstd3	ENSMUSG00000028251
4	0	comp86056_c0	exon2	211	Ythdf3	ENSMUSG00000047213
4	0	comp85464_c0	exon11	183	Ggh	ENSMUSG00000073987
4	1.67068	comp73725_c0	exon3	248	Fbxl4	ENSMUSG00000040410
4	1.67068	comp83508_c2	exon20	92	Mms22l	ENSMUSG00000045751
4	1.67068	comp83508_c2	exon20	77	Mms22l	ENSMUSG00000045751
4	6.13023	comp66716_c0	exon80	103	Trp53inp1	ENSMUSG00000028211
4	6.13023	comp15073_c0	exon1	1578	Ints8	ENSMUSG00000040738
4	6.13023	comp75406_c0	exon21	255	Plekhf2	ENSMUSG00000049969
4	10.0817	comp15850_c0	exon2	609	Fam92a	ENSMUSG00000028218
4	10.0817	comp15850_c0	exon2	657	Fam92a	ENSMUSG00000028218
4	17.5998	comp80756_c0	exon3	1138	Manea	ENSMUSG00000040520
4	17.5998	comp21079_c0	exon17	130	Otud6b	ENSMUSG00000040550
4	17.5998	comp21079_c0	exon17	152	Otud6b	ENSMUSG00000040550
4	17.5998	comp64293_c0	exon50	105	Slc26a7	ENSMUSG00000040569
4	17.5998	comp75611_c0	exon27	189	Tmem64	ENSMUSG00000043252
4	20.4286	comp83785_c0	exon1	1283	Rp1	ENSMUSG00000025900
4	20.4286	comp40308_c0	exon1	620	Lypla1	ENSMUSG00000025903
4	20.4286	comp56785_c0	exon30	1131	Rb1cc1	ENSMUSG00000025907
4	20.4286	comp72000_c0	exon12	162	Tmem68	ENSMUSG00000028232
4	20.4286	comp72000_c0	exon12	155	Tmem68	ENSMUSG00000028232
4	20.4286	comp82950_c2	exon2	2205	Tgs1	ENSMUSG00000028233
4	20.4286	comp77297_c0	exon2	124	Tcea1	ENSMUSG00000033813
4	20.4286	comp77297_c0	exon2	101	Tcea1	ENSMUSG00000033813
4	23.3385	comp67587_c1	exon2	66	Fam110b	ENSMUSG00000049119
4	23.3385	comp43017_c0	exon9	340	Impad1	ENSMUSG00000066324
4	26.1791	comp78762_c2	exon3	2550	Asph	ENSMUSG00000028207
4	27.2495	comp67242_c0	exon2	113	Sgk3	ENSMUSG00000025915
4	27.2495	comp67242_c0	exon2	90	Sgk3	ENSMUSG00000025915
4	27.2495	comp86320_c0	exon2	259	Cops5	ENSMUSG00000025917
4	27.2495	comp77373_c0	exon1	2983	Vcpip1	ENSMUSG00000045210
4	27.2495	comp85257_c0	exon10	99	Arfgef1	ENSMUSG00000067851
4	31.0933	comp79930_c0	exon24	126	Prex2	ENSMUSG00000048960
4	34.9734	comp16431_c0	exon1	55	Ly96	ENSMUSG00000025779
4	34.9734	comp84947_c0	exon19	89	Tram1	ENSMUSG00000025935
4	34.9734	comp86467_c0	exon17	266	Lactb2	ENSMUSG00000025937
4	34.9734	comp15929_c0	exon13	185	Ube2w	ENSMUSG00000025939
4	34.9734	comp63454_c1	exon3	633	Tmem70	ENSMUSG00000025940
4	35.5112	comp41527_c0	exon17	146	Tpd52	ENSMUSG00000027506
4	35.5112	comp20316_c0	exon1	237	Fabp5	ENSMUSG00000027533
4	35.5112	comp84775_c0	exon12	210	Car2	ENSMUSG00000027562
4	35.5112	comp77575_c0	exon16	134	Zfand1	ENSMUSG00000039795
4	35.5112	comp67295_c0	exon5	205	Mrps28	ENSMUSG00000040269
4	35.5112	comp80900_c0	exon10	178	Hey1	ENSMUSG00000040289
4	35.5112	comp56621_c0	exon4	291	Pex2	ENSMUSG00000040374
4	36.5818	comp71023_c0	exon8	485	Msantd4	ENSMUSG00000041124
4	36.5818	comp56613_c0	exon16	50	Mmp13	ENSMUSG00000050578
4	36.5818	comp56613_c0	exon16	88	Mmp13	ENSMUSG00000050578
4	38.2174	comp80444_c1	exon2	675	Birc3	ENSMUSG00000032000
4	38.2174	comp80444_c1	exon2	682	Birc3	ENSMUSG00000032000
4	38.2174	comp41839_c0	exon28	172	Arhgap42	ENSMUSG00000050730
4	38.2174	comp78565_c0	exon3	393	Tmem123	ENSMUSG00000050912
4	38.2174	comp80444_c0	exon13	183	Birc2	ENSMUSG00000057367
4	38.2174	comp82579_c0	exon20	846	Jrkl	ENSMUSG00000079083
4	38.2174	comp82579_c0	exon20	845	Jrkl	ENSMUSG00000079083
4	38.2174	comp64674_c0	exon4	622	Tceb1	ENSMUSG00000079658
4	40.4038	comp15868_c0	exon13	114	Mtmr2	ENSMUSG00000031918
4	40.4038	comp68408_c0	exon25	81	Cep57	ENSMUSG00000031922
4	40.4038	comp68408_c0	exon25	82	Cep57	ENSMUSG00000031922
4	40.4038	comp68408_c0	exon25	102	Cep57	ENSMUSG00000031922
4	40.4038	comp56663_c0	exon23	215	Mre11a	ENSMUSG00000031928
4	40.4038	comp86222_c0	exon10	85	Sesn3	ENSMUSG00000032009
4	40.4038	comp86222_c0	exon10	104	Sesn3	ENSMUSG00000032009
4	40.4038	comp86092_c0	exon31	525	Endod1	ENSMUSG00000037419
4	40.4038	comp85425_c0	exon2	1816	Fut4	ENSMUSG00000049307
4	40.9213	comp56417_c0	exon4	1057	Chordc1	ENSMUSG00000001774
4	40.9213	comp15956_c0	exon1	57	Rtn4	ENSMUSG00000020458
4	40.9213	comp49232_c0	exon2	1210	Rtn4	ENSMUSG00000020458
4	40.9213	comp85753_c0	exon3	193	Rps27a	ENSMUSG00000020460
4	40.9213	comp78764_c1	exon3	2045	Pnpt1	ENSMUSG00000020464
4	40.9213	comp80365_c0	exon9	407	Panx1	ENSMUSG00000031934
4	40.9213	comp46284_c0	exon15	112	4931406C07Rik	ENSMUSG00000031938
4	40.9213	comp52287_c0	exon4	166	Prorsd1	ENSMUSG00000032673
4	40.9213	comp84586_c2	exon24	79	Ccdc88a	ENSMUSG00000032740
4	40.9213	comp74257_c0	exon1	2015	Psme4	ENSMUSG00000040850
4	40.9213	comp81617_c0	exon1	1826	Slc36a4	ENSMUSG00000043885
4	45.4287	comp85059_c0	exon6	37	Cct4	ENSMUSG00000007739
4	45.4287	comp55869_c0	exon1	850	Pex13	ENSMUSG00000020283
4	45.4287	comp15461_c0	exon2	2562	Xpo1	ENSMUSG00000020290
4	45.4287	comp84024_c1	exon3	1684	Wdpcp	ENSMUSG00000020319
4	45.4287	comp84810_c0	exon12	97	Mdh1	ENSMUSG00000020321
4	45.4287	comp77422_c0	exon9	82	0610010F05Rik	ENSMUSG00000042208
4	45.4287	comp56893_c0	exon3	1229	Aftph	ENSMUSG00000049659
4	45.4287	comp79234_c0	exon10	167	Fam161a	ENSMUSG00000049811
4	45.4287	comp79234_c0	exon10	224	Fam161a	ENSMUSG00000049811
4	47.5915	comp64487_c0	exon6	42	C1d	ENSMUSG00000000581
4	47.5915	comp15789_c0	exon12	434	Ddx56	ENSMUSG00000004393
4	47.5915	comp82305_c0	exon12	201	Etaa1	ENSMUSG00000016984
4	47.5915	comp75276_c0	exon44	133	Arap2	ENSMUSG00000037999
4	52.1056	comp71110_c0	exon6	143	Tbrg4	ENSMUSG00000000384
4	52.1056	comp55833_c0	exon6	66	Mfsd10	ENSMUSG00000001082
4	52.1056	comp85972_c0	exon16	66	Slbp	ENSMUSG00000004642
4	52.1056	comp85620_c0	exon5	389	Tmem129	ENSMUSG00000019295
4	52.1056	comp17995_c0	exon16	352	Cobl	ENSMUSG00000020173
4	52.1056	comp17995_c0	exon16	341	Cobl	ENSMUSG00000020173
4	52.1056	comp17995_c0	exon16	377	Cobl	ENSMUSG00000020173
4	52.1056	comp84787_c0	exon23	241	Grb10	ENSMUSG00000020176
4	52.1056	comp86235_c0	exon1	2032	Ascc2	ENSMUSG00000020412
4	52.1056	comp55575_c0	exon6	101	Tcn2	ENSMUSG00000020432
4	52.1056	comp74894_c0	exon1	1761	Rnf185	ENSMUSG00000020448
4	52.1056	comp62248_c0	exon1	1823	Limk2	ENSMUSG00000020451
4	52.1056	comp80972_c2	exon2	2291	Ogdh	ENSMUSG00000020456
4	52.1056	comp53340_c0	exon2	173	Drg1	ENSMUSG00000020457
4	52.1056	comp56646_c0	exon34	94	Ccdc117	ENSMUSG00000020482
4	52.1056	comp70969_c0	exon1	687	Xbp1	ENSMUSG00000020484
4	52.1056	comp70969_c0	exon1	710	Xbp1	ENSMUSG00000020484
4	52.1056	comp52107_c0	exon3	271	Htra3	ENSMUSG00000029096
4	52.1056	comp52107_c0	exon3	301	Htra3	ENSMUSG00000029096
4	52.1056	comp73564_c0	exon43	363	Acox3	ENSMUSG00000029098
4	52.1056	comp73564_c0	exon43	385	Acox3	ENSMUSG00000029098
4	52.1056	comp73564_c0	exon43	389	Acox3	ENSMUSG00000029098
4	52.1056	comp64530_c0	exon1	1504	Lrpap1	ENSMUSG00000029103
4	52.1056	comp64530_c0	exon1	1465	Lrpap1	ENSMUSG00000029103
4	52.1056	comp64530_c0	exon1	1470	Lrpap1	ENSMUSG00000029103
4	52.1056	comp50124_c0	exon15	147	Man2b2	ENSMUSG00000029119
4	52.1056	comp79684_c3	exon7	190	Tbc1d1	ENSMUSG00000029174
4	52.1056	comp79684_c3	exon7	175	Tbc1d1	ENSMUSG00000029174
4	52.1056	comp83051_c3	exon9	1984	D5Ertd579e	ENSMUSG00000029190
4	52.1056	comp73369_c0	exon4	1850	Gas2l1	ENSMUSG00000034201
4	52.1056	comp56907_c1	exon28	146	Mtmr3	ENSMUSG00000034354
4	52.1056	comp56907_c1	exon28	179	Mtmr3	ENSMUSG00000034354
4	52.1056	comp80342_c0	exon5	2207	Uvssa	ENSMUSG00000037355
4	52.1056	comp81200_c1	exon2	3184	Depdc5	ENSMUSG00000037426
4	52.1056	comp57509_c0	exon4	129	H2afv	ENSMUSG00000041126
4	52.1056	comp48076_c0	exon46	257	Nat8l	ENSMUSG00000048142
4	52.1056	comp74802_c0	exon7	105	Lins	ENSMUSG00000053091
4	52.1056	comp70914_c0	exon1	1632	Nudcd3	ENSMUSG00000053838
4	52.1056	comp80784_c2	exon16	257	Prr14l	ENSMUSG00000054280
4	52.1056	comp47816_c0	exon3	680	Bloc1s4	ENSMUSG00000060708
4	52.1056	comp82244_c0	exon6	388	Haus3	ENSMUSG00000079555
4	56.1657	comp56326_c1	exon8	706	Med28	ENSMUSG00000015804
4	56.1657	comp85242_c0	exon15	100	Qdpr	ENSMUSG00000015806
4	56.1657	comp84510_c0	exon34	192	Prom1	ENSMUSG00000029086
4	56.1657	comp85590_c0	exon4	238	Dhx15	ENSMUSG00000029169
4	56.1657	comp55473_c0	exon2	1630	Anapc4	ENSMUSG00000029176
4	56.1657	comp72273_c1	exon19	57	Zcchc4	ENSMUSG00000029179
4	56.1657	comp72273_c1	exon19	53	Zcchc4	ENSMUSG00000029179
4	56.1657	comp15196_c0	exon18	161	Tapt1	ENSMUSG00000046985
4	56.1657	comp49447_c0	exon2	655	Msx1	ENSMUSG00000048450
4	56.1657	comp49447_c0	exon2	597	Msx1	ENSMUSG00000048450
4	56.1657	comp85535_c0	exon7	273	Tmem128	ENSMUSG00000067365
4	56.1657	comp85535_c0	exon7	345	Tmem128	ENSMUSG00000067365
4	56.1657	comp85535_c0	exon7	332	Tmem128	ENSMUSG00000067365
4	56.1657	comp83734_c0	exon10	80	Fam169b	ENSMUSG00000074071
4	56.7069	comp68607_c0	exon3	400	Folr1	ENSMUSG00000001827
4	58.5221	comp80418_c0	exon2	362	Asb7	ENSMUSG00000030509
4	58.5221	comp86395_c0	exon2	1745	Mtmr10	ENSMUSG00000030522
4	58.5221	comp64774_c0	exon2	1585	Chsy1	ENSMUSG00000032640
4	58.5221	comp70437_c0	exon1	1367	Klhl5	ENSMUSG00000054920
4	58.5221	comp79496_c0	exon5	112	0610040J01Rik	ENSMUSG00000060512
4	59.0542	comp64683_c0	exon5	1140	Lrrc28	ENSMUSG00000030556
4	59.0542	comp79791_c0	exon12	304	Lysmd4	ENSMUSG00000043831
4	59.0542	comp79791_c0	exon12	319	Lysmd4	ENSMUSG00000043831
4	59.0542	comp86391_c0	exon4	532	Hs3st1	ENSMUSG00000051022
4	59.0542	comp86391_c0	exon4	545	Hs3st1	ENSMUSG00000051022
4	59.0542	comp84001_c1	exon19	63	Fes	ENSMUSG00000053158
4	59.0542	comp77403_c0	exon14	650	Mesdc1	ENSMUSG00000070462
4	60.6963	comp64196_c0	exon18	127	Pde8a	ENSMUSG00000025584
4	60.6963	comp82485_c0	exon26	115	Homer2	ENSMUSG00000025813
4	60.6963	comp82485_c0	exon26	71	Homer2	ENSMUSG00000025813
4	60.6963	comp70203_c0	exon14	523	Furin	ENSMUSG00000030530
4	60.6963	comp70203_c0	exon14	553	Furin	ENSMUSG00000030530
4	60.6963	comp78067_c0	exon19	93	Unc45a	ENSMUSG00000030533
4	60.6963	comp65533_c0	exon2	703	Cib1	ENSMUSG00000030538
4	60.6963	comp79136_c0	exon19	275	Sema4b	ENSMUSG00000030539
4	60.6963	comp82516_c7	exon11	232	Idh2	ENSMUSG00000030541
4	60.6963	comp84303_c0	exon2	1009	Mctp2	ENSMUSG00000032776
4	60.6963	comp48601_c0	exon4	176	Mesdc2	ENSMUSG00000038503
4	60.6963	comp72628_c0	exon1	773	Fam103a1	ENSMUSG00000038646
4	60.6963	comp80262_c0	exon5	2486	Man2a2	ENSMUSG00000038886
4	60.6963	comp70133_c0	exon2	814	2610034B18Rik	ENSMUSG00000039043
4	60.6963	comp81861_c0	exon32	89	Anpep	ENSMUSG00000039062
4	60.6963	comp81340_c0	exon1	992	Rlbp1	ENSMUSG00000039194
4	60.6963	comp81221_c1	exon17	161	Abhd2	ENSMUSG00000039202
4	60.6963	comp81221_c1	exon17	185	Abhd2	ENSMUSG00000039202
4	60.6963	comp81221_c1	exon17	143	Abhd2	ENSMUSG00000039202
[truncated: 2,450 more rows]
